# Supplementary material for: Zr vs. Ti molecular and silica-supported imido complexes in stoichiometric and catalytic oxo/imido heterometathesis
Source: Royal Society of Chemistry journal article supplement (doi:10.1039/d3qi00735a), 2023-01-01
Supplement: d3qi00735a1.pdf [file d3qi00735a1.pdf]

## Supporting Information for :

# Zr vs. Ti Molecular and Silica-Supported Imido Complexes in Stoichiometric and Catalytic Oxo/Imido Heterometathesis

Andrey V. Pichugov,<sup>a</sup> Andrey V. Rumyantsev,<sup>a,b</sup> Nikolai S. Bushkov,<sup>a</sup> Anton A. Zhizhin,<sup>a</sup>  
Dmitry Yu. Aleshin,<sup>c</sup> Valeria N. Talanova,<sup>a</sup> Rina U. Takazova,<sup>a</sup> David Trummer,<sup>d</sup> Deni Mance,<sup>d</sup>  
Pavel A. Zhizhko<sup>\*,a</sup> and Dmitry N. Zarubin<sup>\*,a</sup>

<sup>a</sup>A. N. Nesmeyanov Institute of Organoelement Compounds, Russian Academy of Sciences, Vavilov str., 28, 119334 Moscow, Russia

<sup>b</sup>Department of Chemistry, Moscow State University, Vorob'evy Gory, 1, 119991 Moscow, Russia

<sup>c</sup>Kurnakov Institute of General and Inorganic Chemistry, Russian Academy of Sciences, Leninskii prosp. 31, 119071 Moscow, Russia.

<sup>d</sup>Department of Chemistry and Applied Biosciences, ETH Zürich, Vladimir-Prelog Weg, 2, CH 8093 Zürich, Switzerland

|                                                                                                                                                    |           |
|----------------------------------------------------------------------------------------------------------------------------------------------------|-----------|
| <b>NMR Spectra of Molecular Complexes</b> .....                                                                                                    | <b>2</b>  |
| <b>Solid-State NMR Spectra of Grafted Zr Complexes</b> .....                                                                                       | <b>6</b>  |
| <b>IR Spectra of Grafted Zr Complexes</b> .....                                                                                                    | <b>8</b>  |
| <b>Stoichiometric Reactions of Molecular and Grafted Complexes</b> .....                                                                           | <b>9</b>  |
| <i>Reaction of Zr(=NtBu)(Me<sub>2</sub>Pyr)<sub>2</sub>(py)<sub>2</sub> (1a) with Ph<sub>2</sub>CO</i> .....                                       | <i>11</i> |
| <i>Reaction of Ti(=NtBu)(Me<sub>2</sub>Pyr)<sub>2</sub>(py)<sub>2</sub> (2a) with Ph<sub>2</sub>CO</i> .....                                       | <i>12</i> |
| <i>Reaction of Ti(=NtBu)(OAr)<sub>2</sub>(py)<sub>2</sub> (2c) with Ph<sub>2</sub>CO</i> .....                                                     | <i>13</i> |
| <i>Reaction of Zr(=NAr)(Me<sub>2</sub>Pyr)<sub>2</sub>(py)<sub>2</sub> (1b) with Ph<sub>2</sub>CO</i> .....                                        | <i>14</i> |
| <i>Reaction of Ti(=NAr)(Me<sub>2</sub>Pyr)<sub>2</sub>(py)<sub>2</sub> (2b) with Ph<sub>2</sub>CO</i> .....                                        | <i>15</i> |
| <i>Observation of the intermediate in the reaction of Ti(=NAr)(Me<sub>2</sub>Pyr)<sub>2</sub>(py)<sub>2</sub> (2b) with Ph<sub>2</sub>CO</i> ..... | <i>16</i> |
| <i>Reactions of grafted complexes with Ph<sub>2</sub>CO</i> .....                                                                                  | <i>17</i> |
| <b>Computational Details</b> .....                                                                                                                 | <b>24</b> |
| <i>Molecular Orbitals</i> .....                                                                                                                    | <i>25</i> |
| <i>Optimized Geometries</i> .....                                                                                                                  | <i>28</i> |
| <b>XRD Crystallography</b> .....                                                                                                                   | <b>32</b> |
| <b>References</b> .....                                                                                                                            | <b>33</b> |

## NMR Spectra of Molecular Complexes

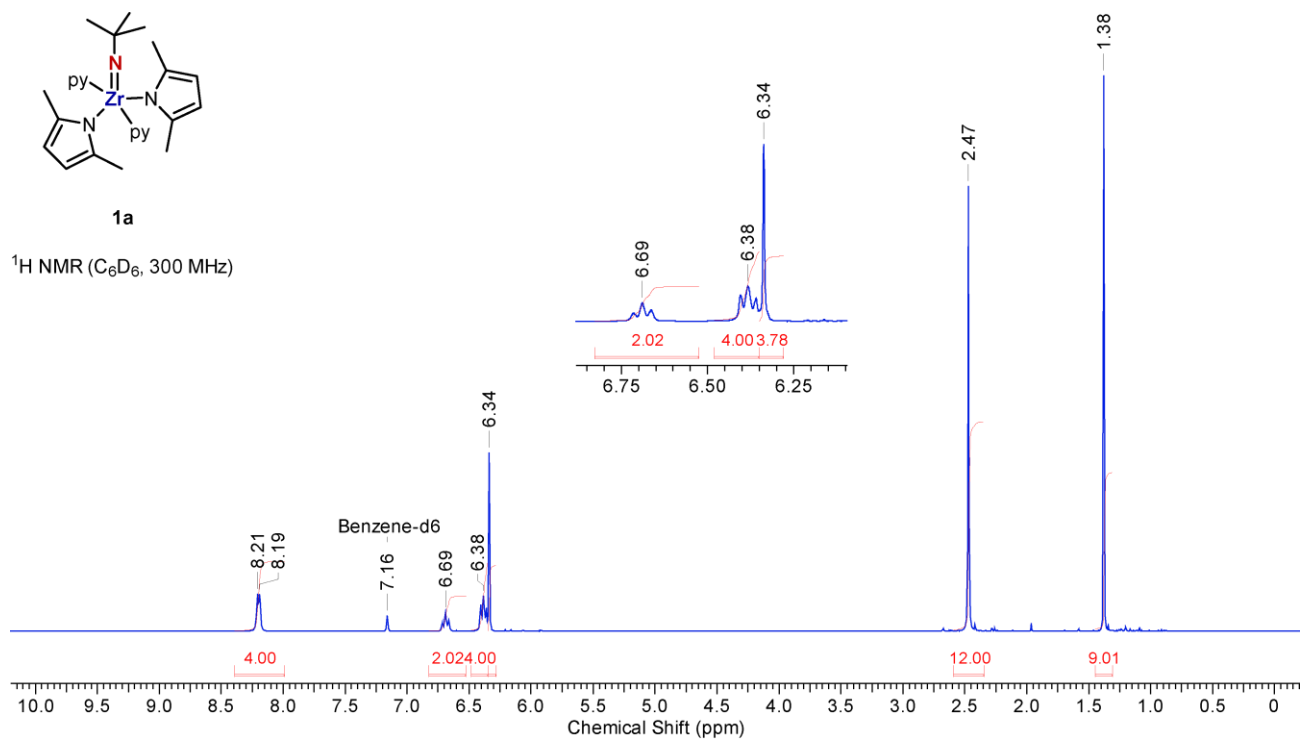

**Fig. S1.**  $^1\text{H NMR}$  spectrum of  $\text{Zr}(=\text{NtBu})(\text{Me}_2\text{Pyr})_2(\text{py})_2$  (**1a**).

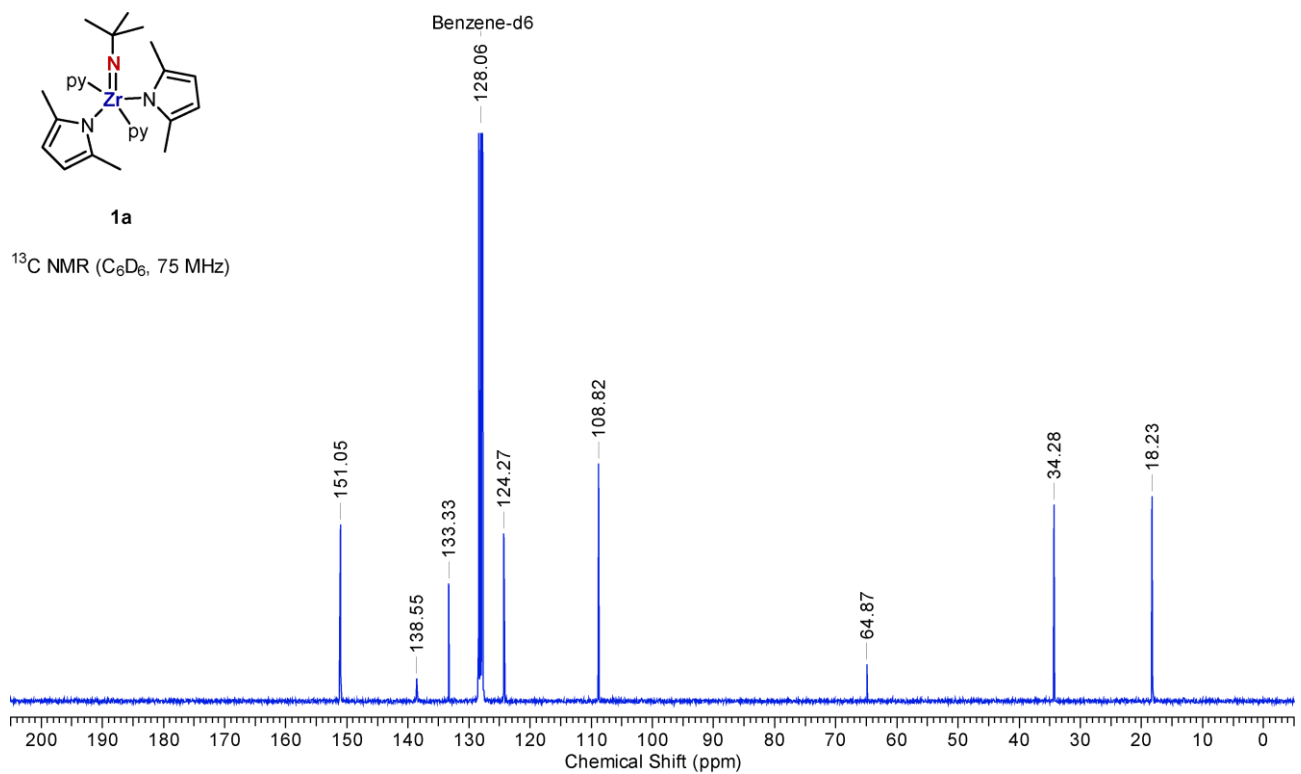

**Fig. S2.**  $^{13}\text{C NMR}$  spectrum of  $\text{Zr}(=\text{NtBu})(\text{Me}_2\text{Pyr})_2(\text{py})_2$  (**1a**).

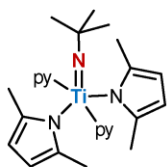

**2a**

$^1\text{H NMR}$  ( $\text{C}_6\text{D}_6$ , 200 MHz)

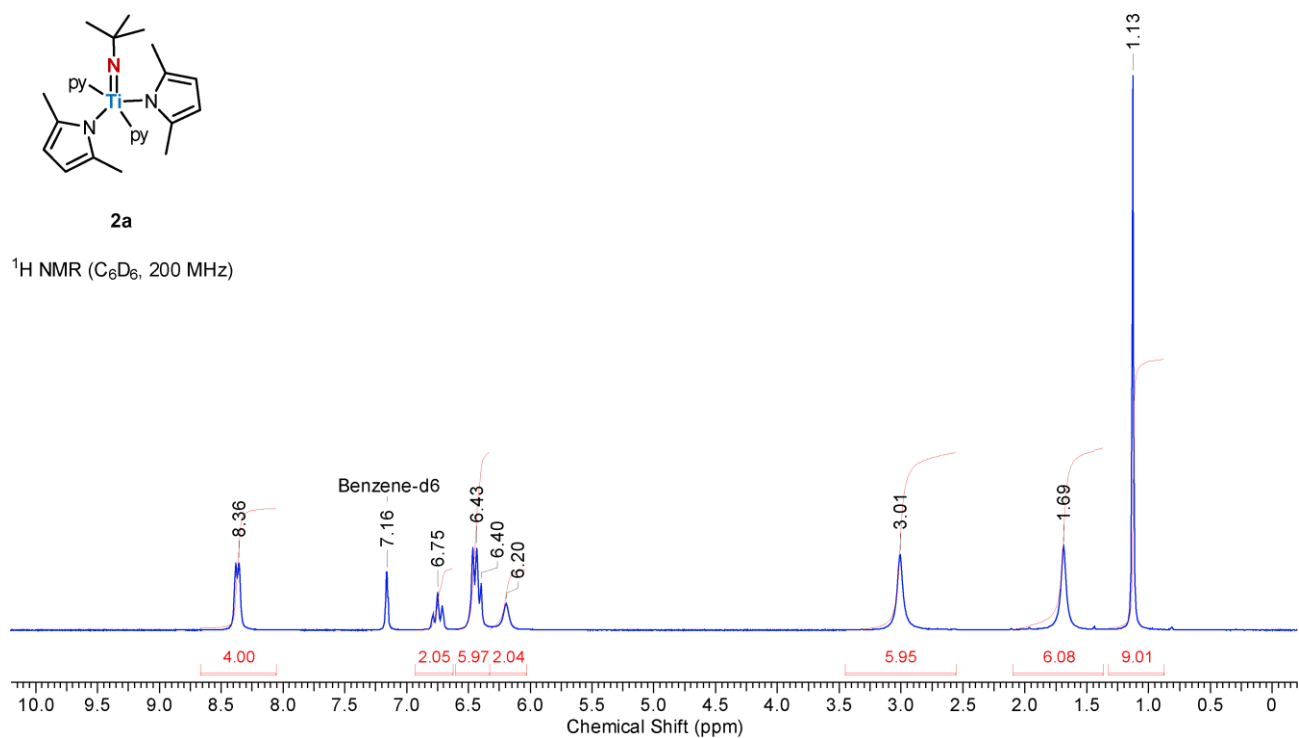

**Fig. S3.**  $^1\text{H NMR}$  spectrum of  $\text{Ti}(=\text{NtBu})(\text{Me}_2\text{Pyr})_2(\text{py})_2$  (**2a**).<sup>[1]</sup>

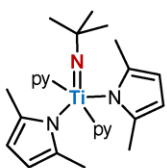

**2a**

$^{13}\text{C NMR}$  ( $\text{C}_6\text{D}_6$ , 75 MHz)

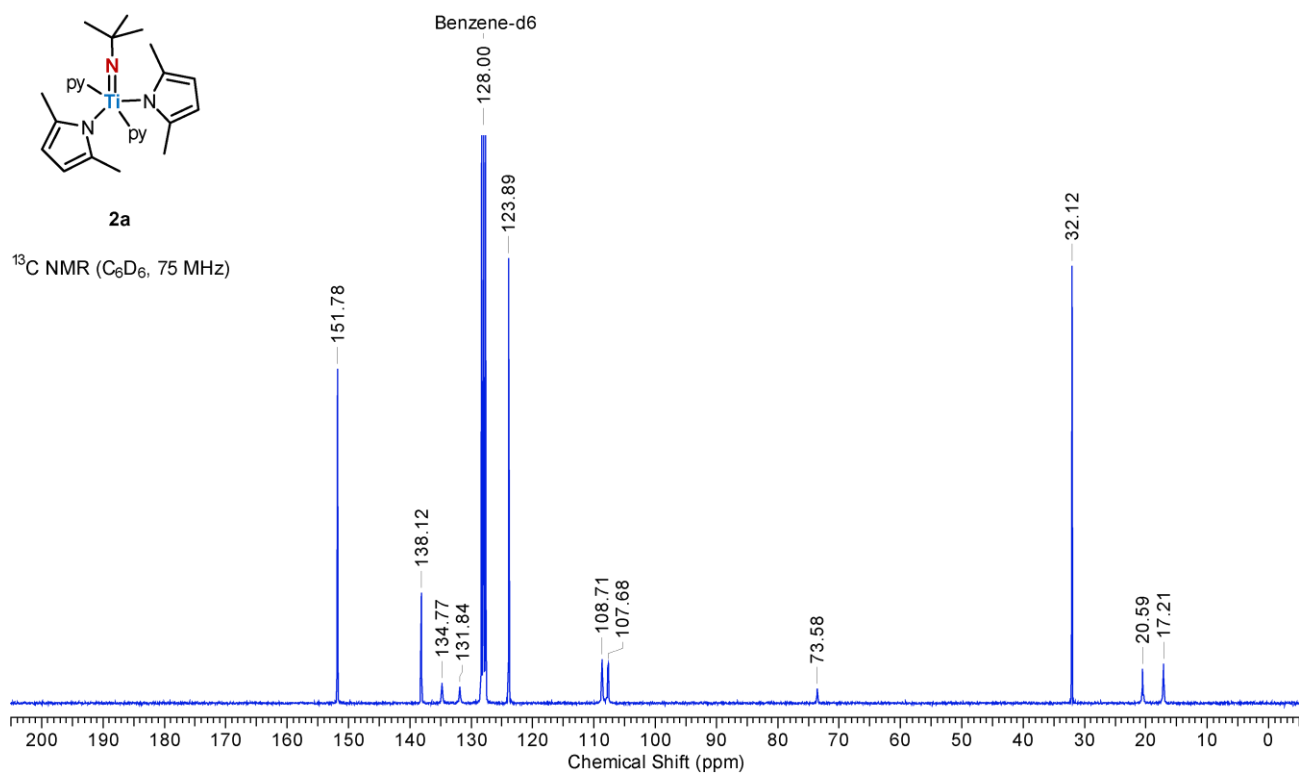

**Fig. S4.**  $^{13}\text{C NMR}$  spectrum of  $\text{Ti}(=\text{NtBu})(\text{Me}_2\text{Pyr})_2(\text{py})_2$  (**2a**).<sup>[1]</sup>

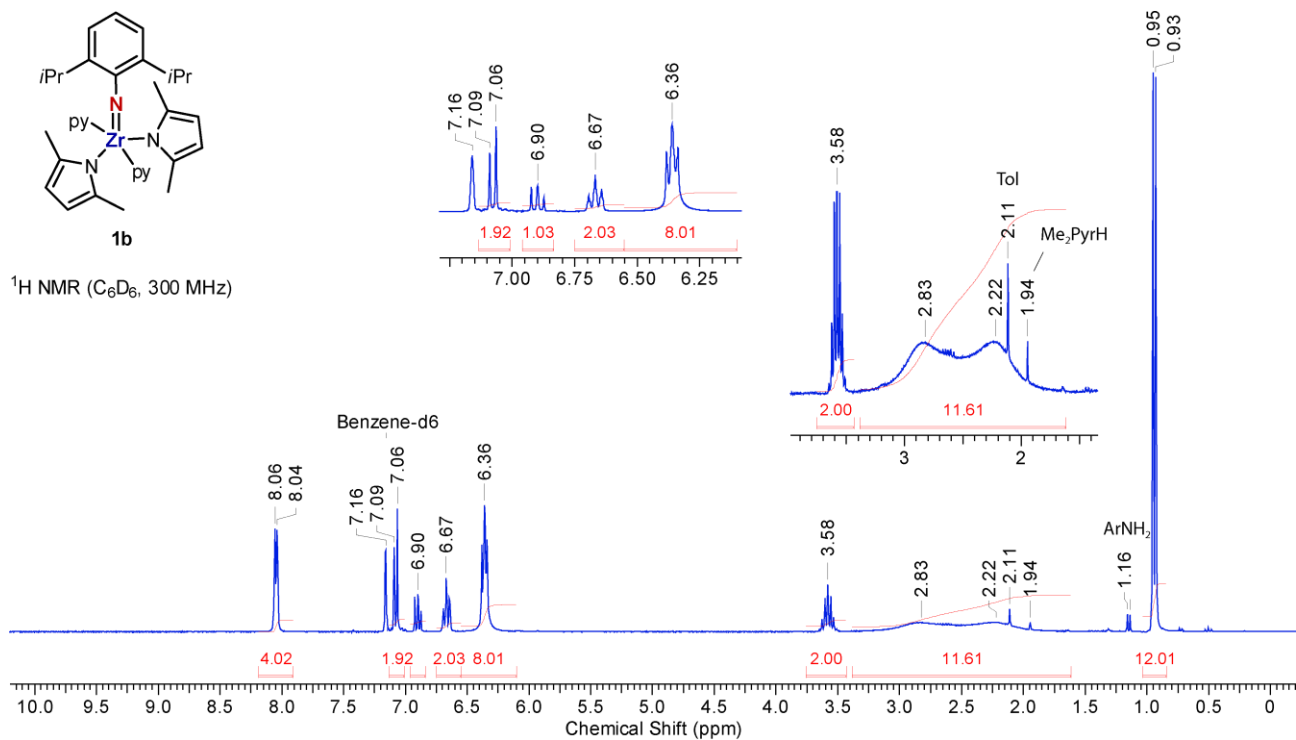

**Fig. S5.**  $^1\text{H NMR}$  spectrum of  $\text{Zr}(=\text{NAr})(\text{Me}_2\text{Pyr})_2(\text{py})_2$  (**1b**).

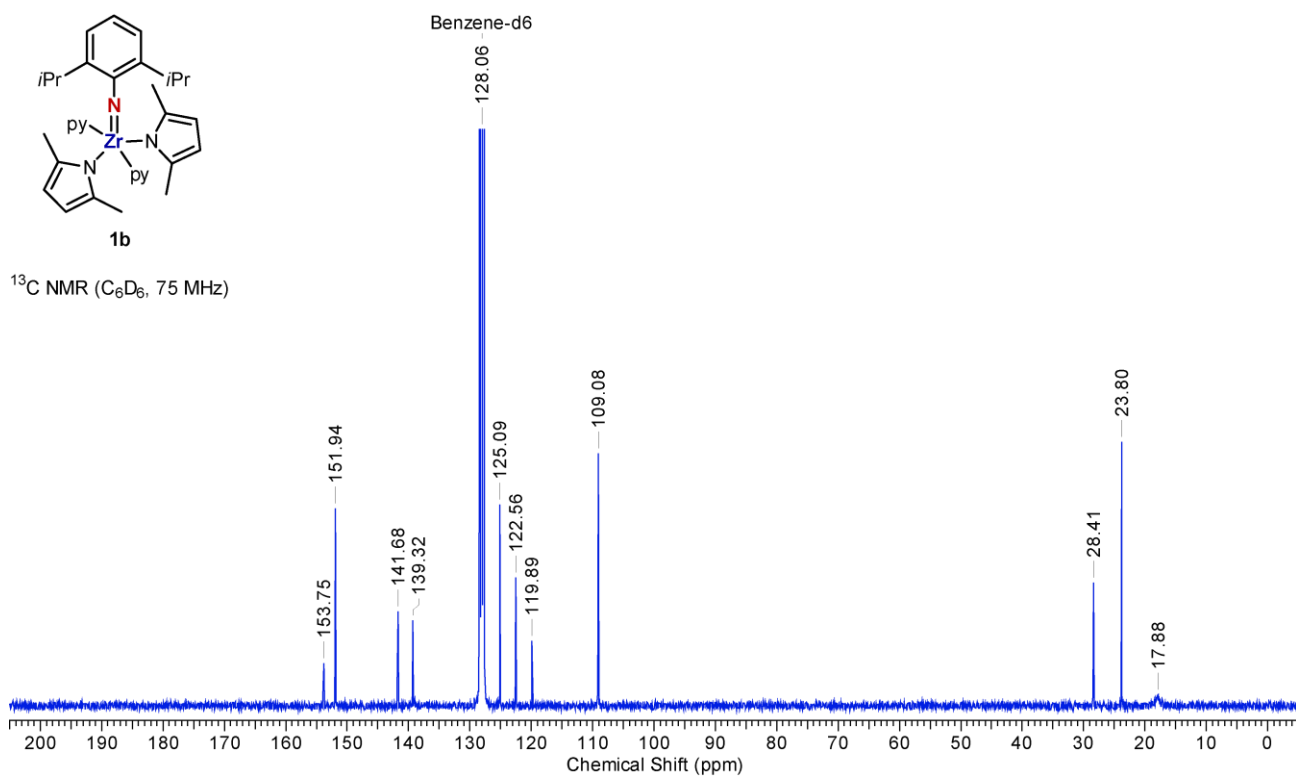

**Fig. S6.**  $^{13}\text{C NMR}$  spectrum of  $\text{Zr}(=\text{NAr})(\text{Me}_2\text{Pyr})_2(\text{py})_2$  (**1b**).

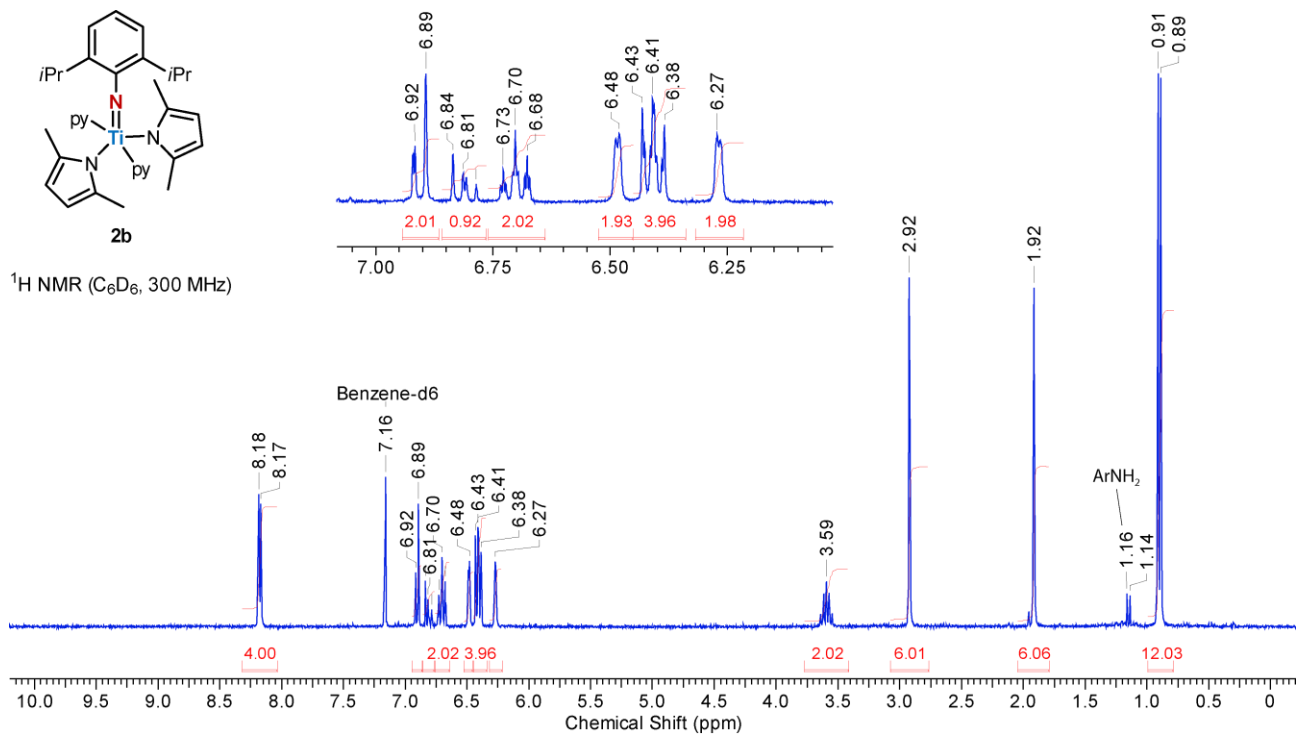

**Fig. S7.** <sup>1</sup>H NMR spectrum of Ti(=NAr)(Me<sub>2</sub>Pyr)<sub>2</sub>(py)<sub>2</sub> (**2b**).

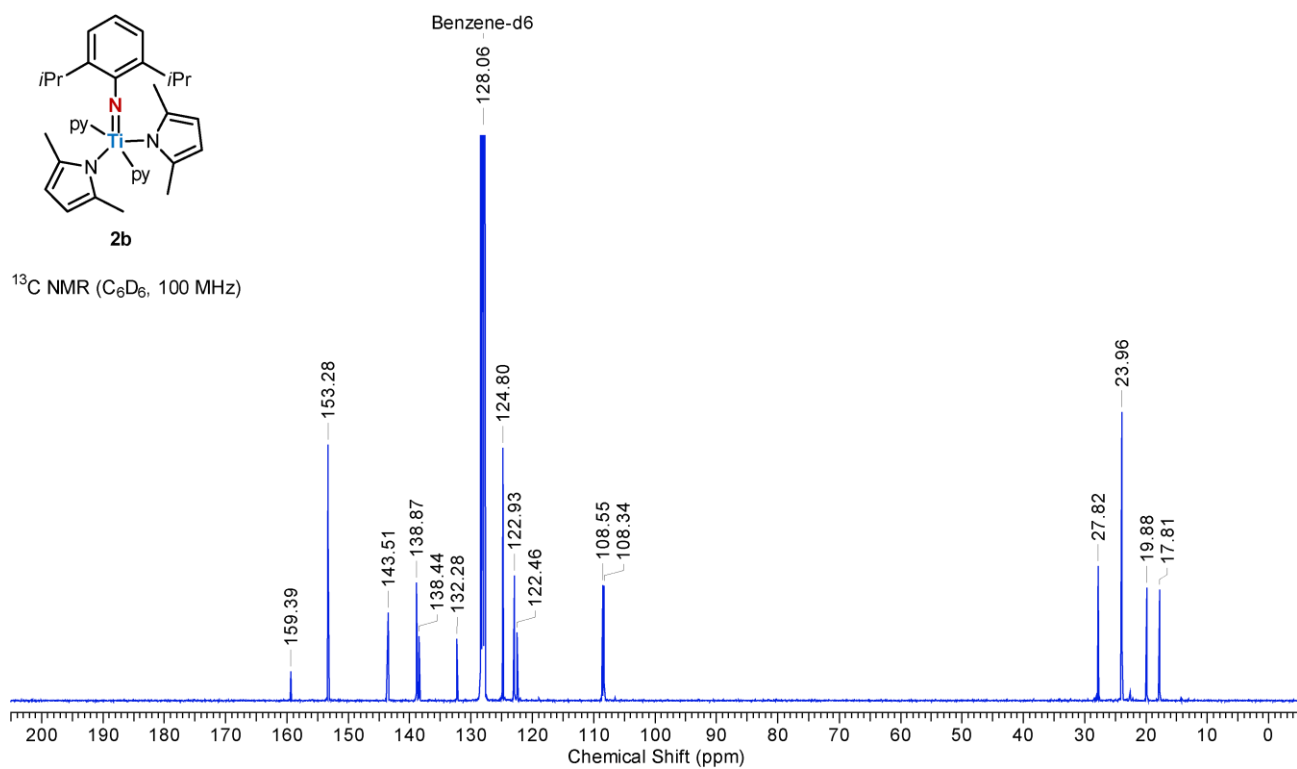

**Fig. S8.** <sup>13</sup>C NMR spectrum of Ti(=NAr)(Me<sub>2</sub>Pyr)<sub>2</sub>(py)<sub>2</sub> (**2b**).

## Solid-State NMR Spectra of Grafted Zr Complexes

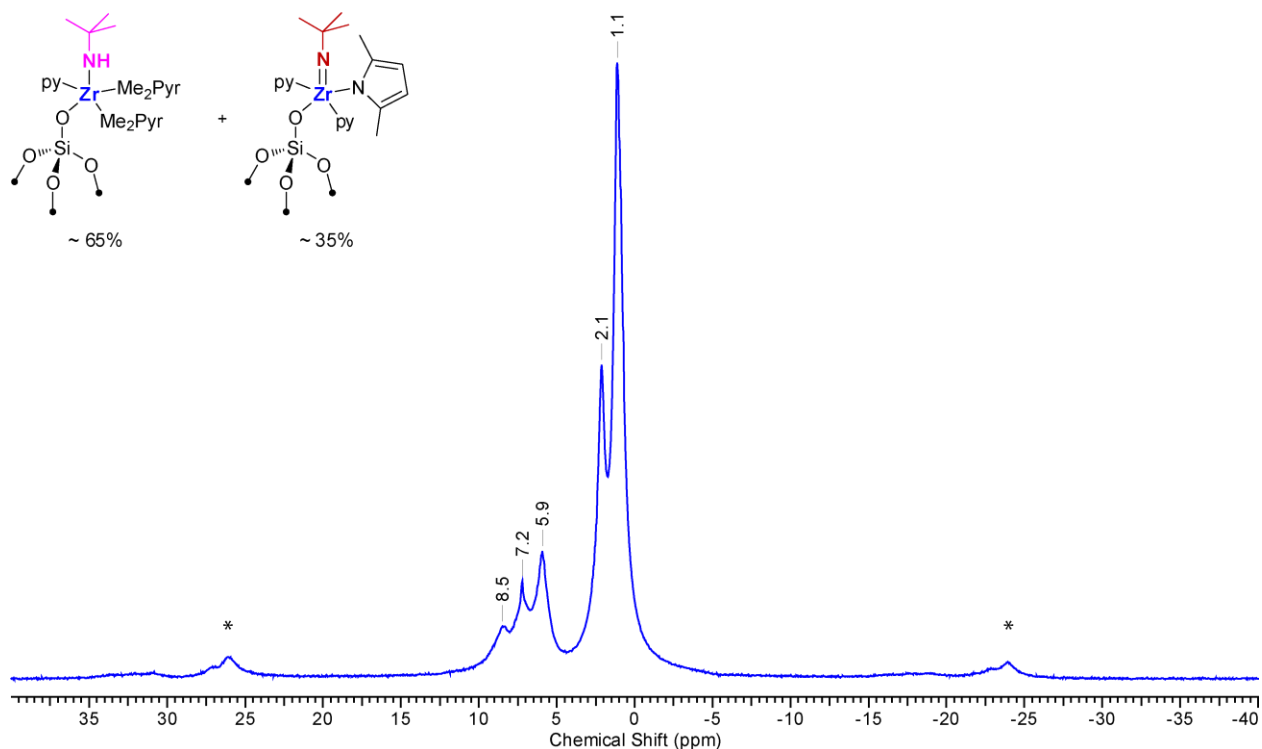

**Fig. S9.** <sup>1</sup>H MAS solid-state NMR spectrum of the material Zr(=NtBu)(Me<sub>2</sub>Pyr)<sub>2</sub>(py)<sub>2</sub>/SiO<sub>2-700</sub> (**1a**/SiO<sub>2</sub>) (400 MHz; 10 kHz MAS). Asterisks indicate spinning side-bands.

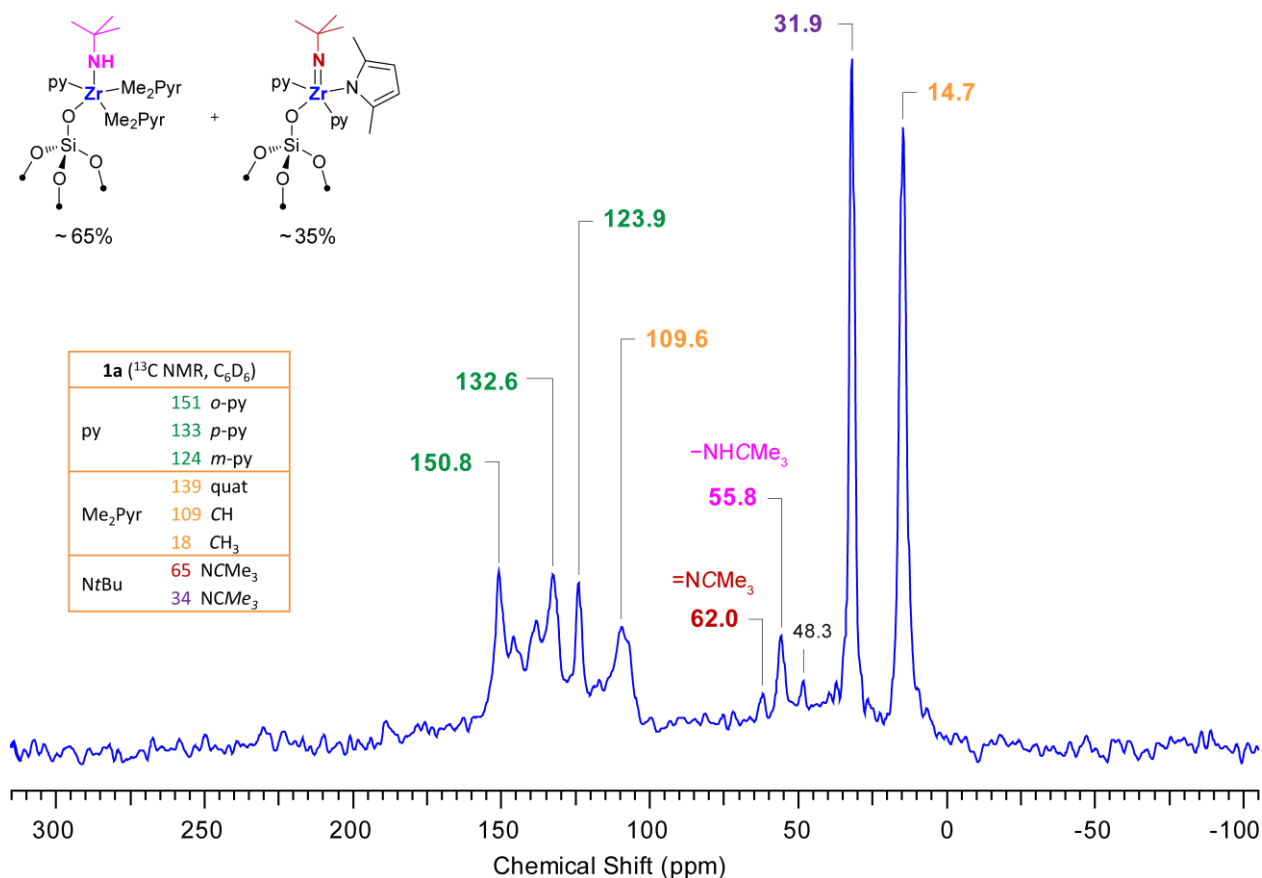

**Fig. S10.** <sup>13</sup>C CP MAS solid-state NMR spectrum of the material Zr(=NtBu)(Me<sub>2</sub>Pyr)<sub>2</sub>(py)<sub>2</sub>/SiO<sub>2-700</sub> (**1a**/SiO<sub>2</sub>) (100 MHz; 10 kHz MAS; CP contact time 3 ms; recycle delay 2 s; 60'000 scans).

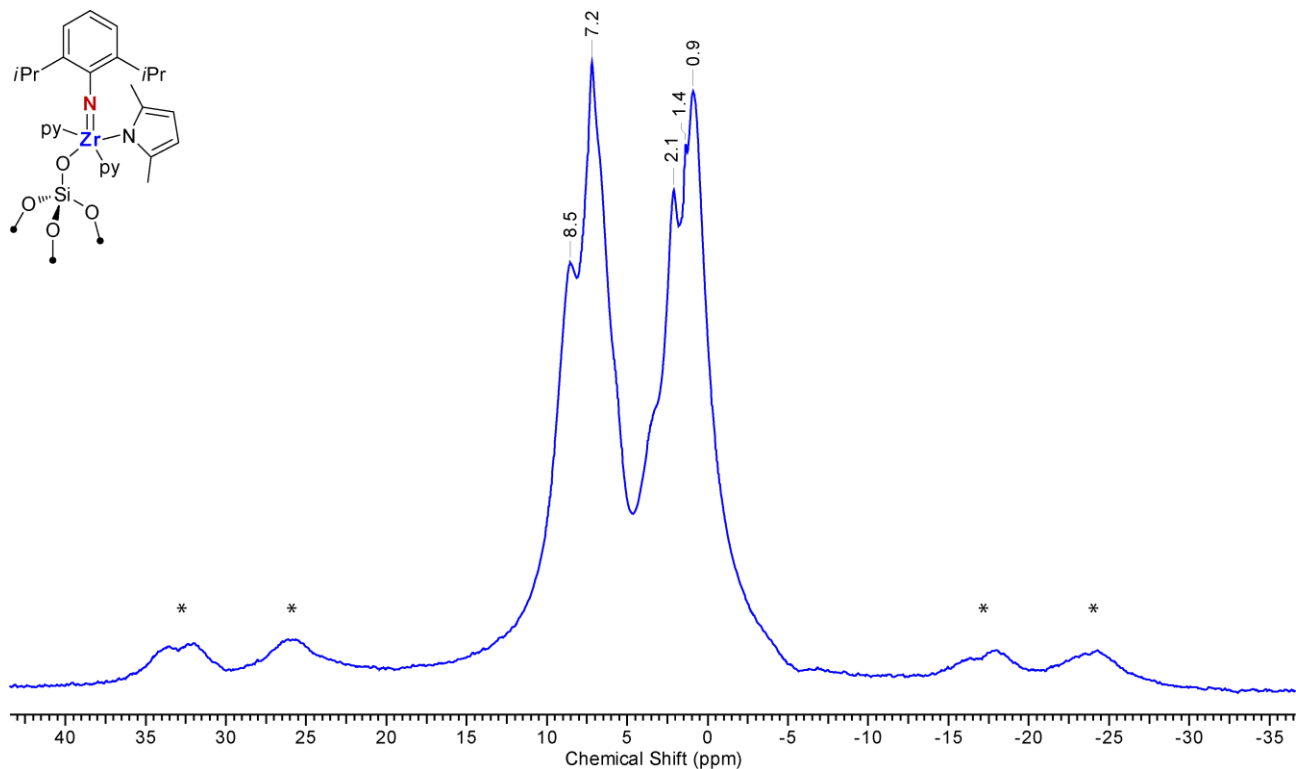

**Fig. S11.**  $^1\text{H}$  MAS solid-state NMR spectrum of the material  $\text{Zr}(=\text{NAr})(\text{Me}_2\text{Pyr})_2(\text{py})_2/\text{SiO}_{2-700}$  (**1b**/ $\text{SiO}_2$ ) (400 MHz; 10 kHz MAS). Asterisks indicate spinning side-bands.

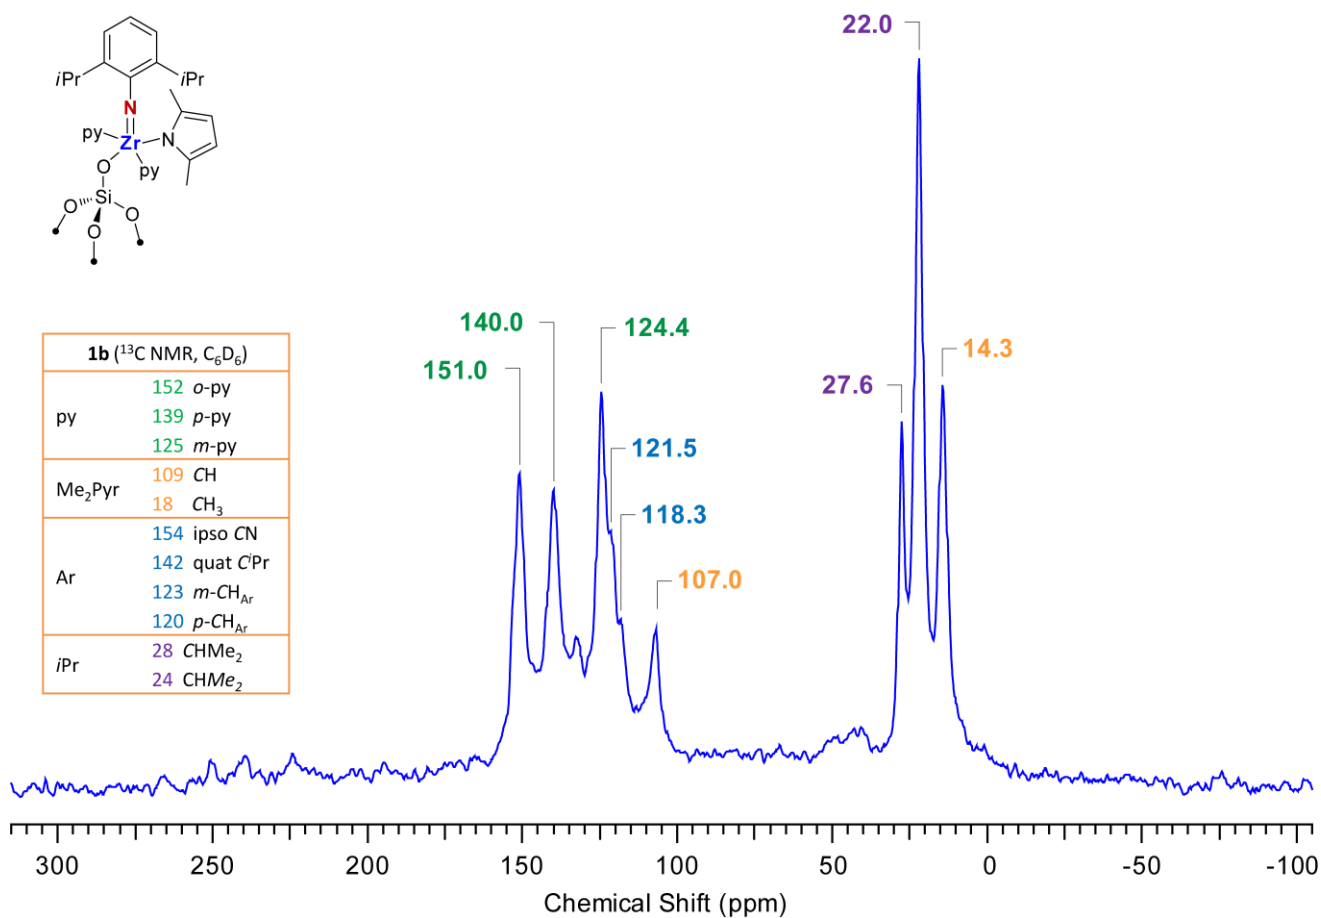

**Fig. S12.**  $^{13}\text{C}$  CP MAS solid-state NMR spectrum of the material  $\text{Zr}(=\text{NAr})(\text{Me}_2\text{Pyr})_2(\text{py})_2/\text{SiO}_{2-700}$  (**1b**/ $\text{SiO}_2$ ) (100 MHz; 10 kHz MAS; CP contact time 3 ms; recycle delay 2 s; 100'000 scans).

## IR Spectra of Grafted Zr Complexes

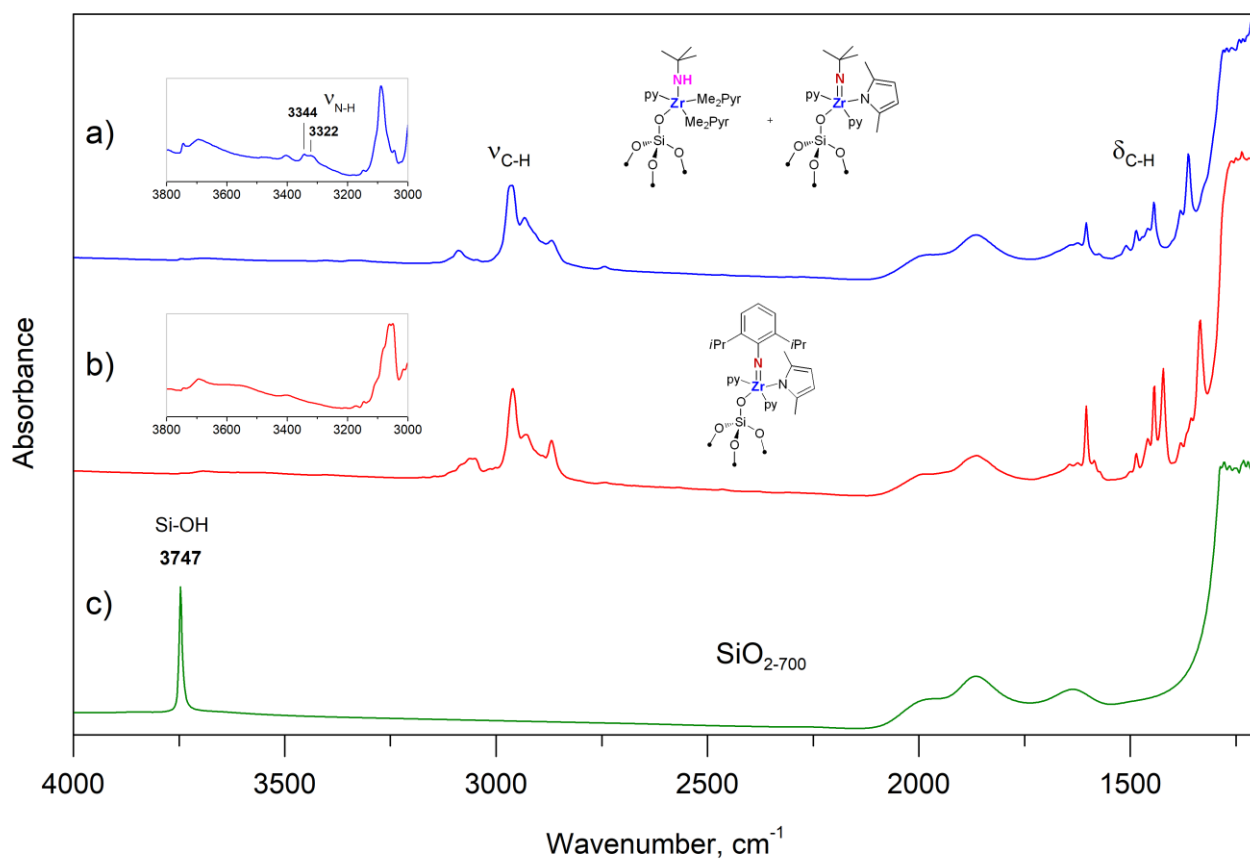

**Fig. S13.** IR spectra of the materials **1a/SiO<sub>2</sub>** (a), **1b/SiO<sub>2</sub>** (b), and **SiO<sub>2-700</sub>** (c).



## Stoichiometric Reactions of Molecular and Grafted Complexes

**General procedure for the reactions with Ph<sub>2</sub>CO.** The pre-weighed amounts of complex, benzophenone and ferrocene (FCH) as an internal standard were placed in a J. Young NMR tube inside a glovebox, dissolved in Tol-d<sub>8</sub> or C<sub>6</sub>D<sub>6</sub> and the reaction was monitored with <sup>1</sup>H NMR spectroscopy.

**General procedure for the reactions of grafted complexes with Ph<sub>2</sub>CO.** The pre-weighed amounts of grafted material, benzophenone and FCH as an internal standard were placed in a J. Young NMR tube inside a glovebox, C<sub>6</sub>D<sub>6</sub> was added and the liquid phase was monitored with <sup>1</sup>H NMR spectroscopy.

**Quantification.** In all experiments the absolute quantities  $n$  (μmols) of the compounds were calculated using the known amount of FCH ( $n_i = n_{\text{FCH}} \times N_{\text{FCH}}/N_i \times A_i/A_{\text{FCH}}$ , where  $A$  is a peak area and  $N$  is a number of protons corresponding to the peak,  $N_{\text{FCH}} = 10$ ). The data is summarized in tables below together with representative spectra. For convenience of calculation FCH is integrated as 100 ( $A_{\text{FCH}} = 100$ ) in all spectra. The vertical scale is kept constant for all figures within one experiment. All quantities in the tables are expressed in % relative to *the total initial amount of the metal complex* in the reaction because this allows one to directly estimate how much [NR] is transformed into the imine, how much extra benzophenone is consumed per 1 equiv of complex, etc. (the reaction loadings are given with every experiment so the quantities in μmols can be easily recovered).

**Note on using ferrocene as internal standard.** FCH is commonly used as an internal standard due to its chemical inertness, symmetry and convenient chemical shift. However one should note that FCH protons have extremely long relaxation time and in order to obtain the correct integration values the delay time (d1) should be set to at least 30 seconds. In all our experiments d1 was set to 60 s and acquisition time to 5 s. All spectra were measured at RT at a frequency 300 MHz.

**The signals used for integration.** The spectra of the complexes are given above (note that Tol-d<sub>8</sub> was chosen in certain cases to ensure better solubility and the chemical shifts in C<sub>6</sub>D<sub>6</sub> and Tol-d<sub>8</sub> are slightly different but the corresponding peaks can be easily identified). All signals of known compounds, unless significantly overlapping, were integrated and used to cross-check the quantification (in most cases the results obtained from different peaks matched well (within 1–3%), otherwise we used the peak that had the least overlap with its neighbors). For benzophenone (abbreviated below as “bph”) very convenient for quantification is the downfield resonance at 7.65 ppm in Tol-d<sub>8</sub> (7.71 in C<sub>6</sub>D<sub>6</sub>). Similarly, for imines, besides the signals attributed to the imino group, we used the downfield resonances at 7.76 (Ph<sub>2</sub>C=NtBu) and 7.89 ppm (Ph<sub>2</sub>C=NAr). Note that for benzophenone this resonance accounts for 4 protons, whereas in the case of imines it is due to 2 protons (see **Fig. S12**). The spectra of benzophenone and imines are given below. Chemical shifts of other relevant compounds (pyridine, Me<sub>2</sub>PyrH, ArNH<sub>2</sub>, etc.) were either taken from literature or identified in other experiments.

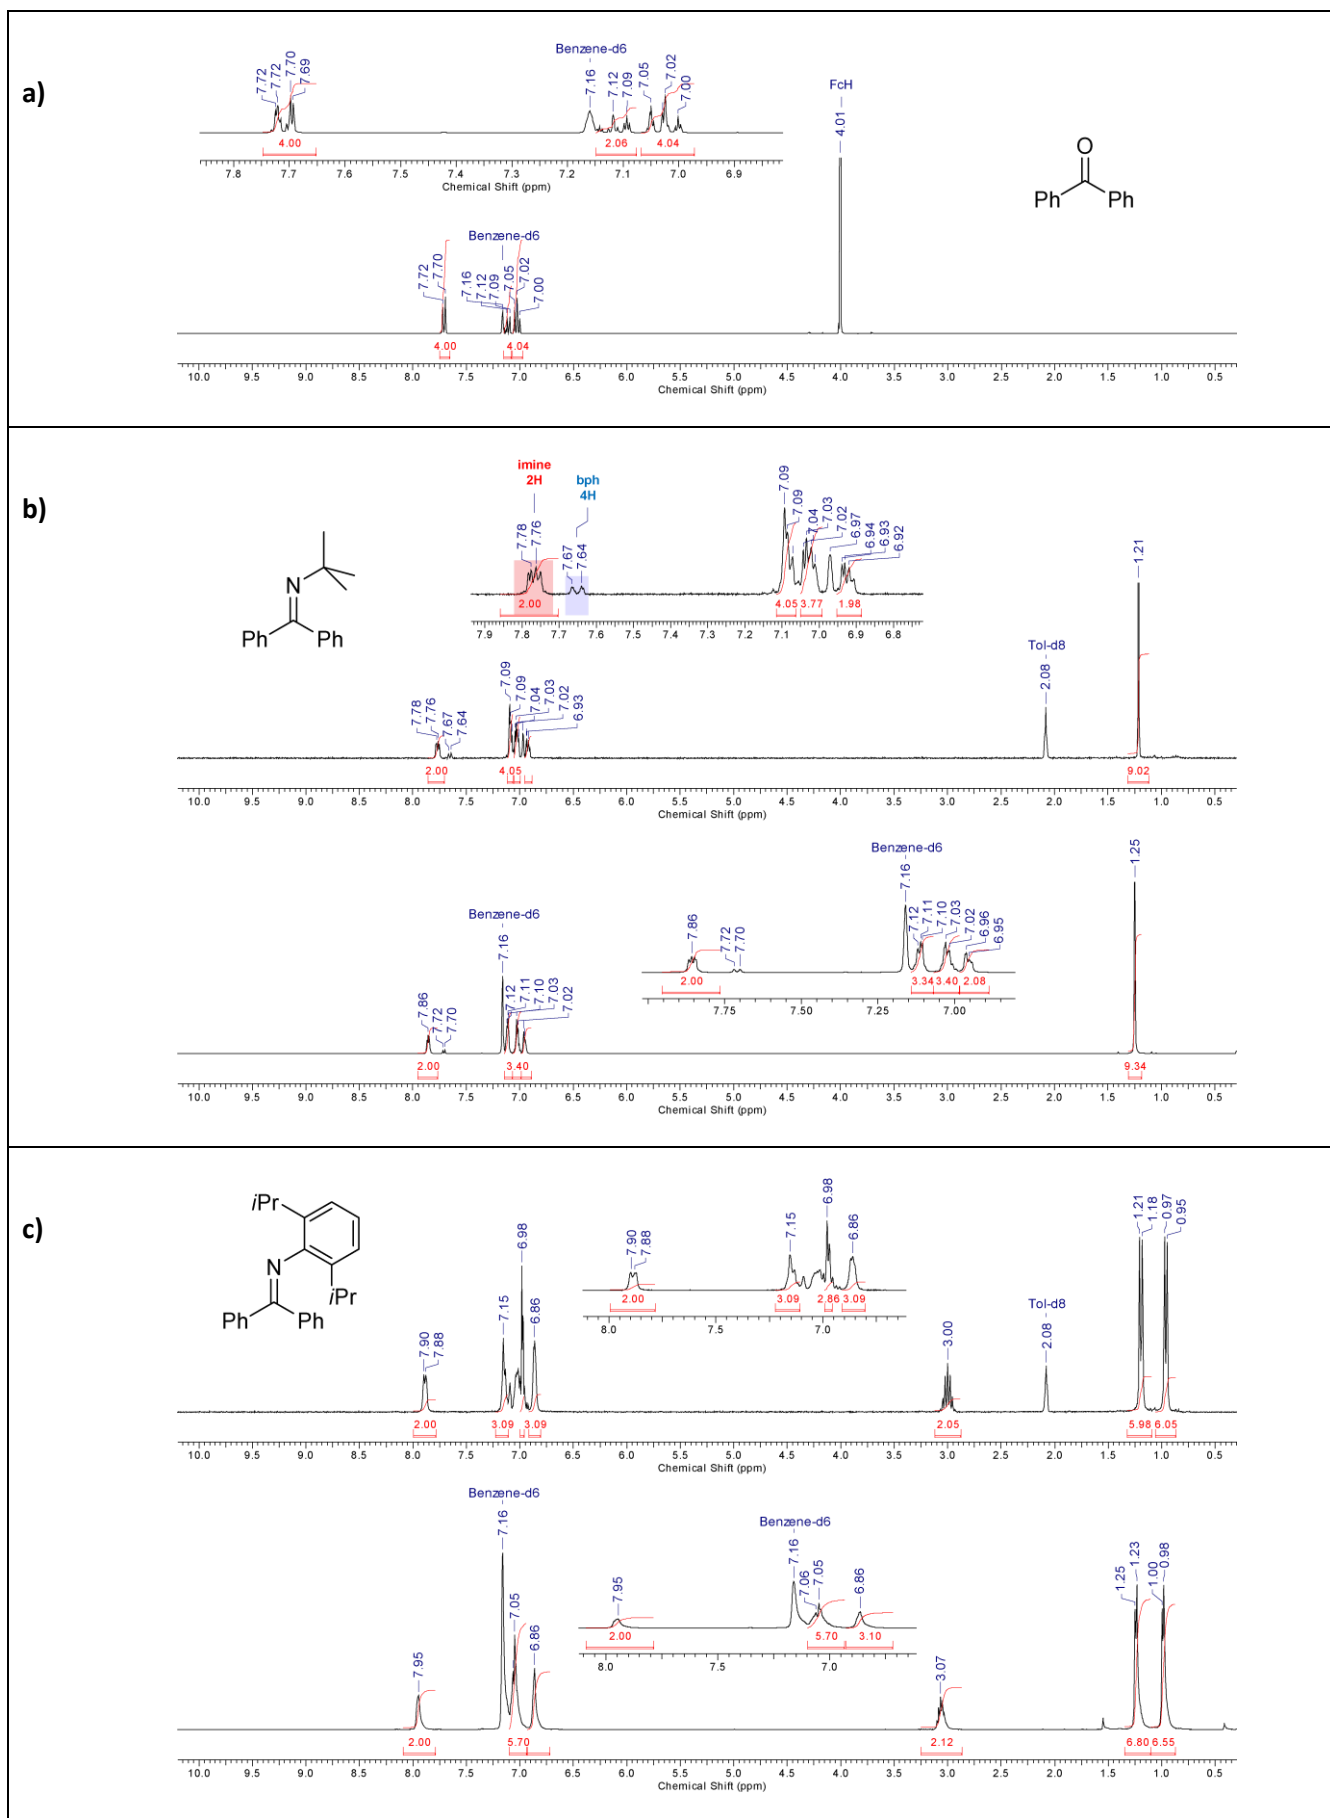

**Fig. S14.**  $^1\text{H}$  NMR spectra of (a)  $\text{Ph}_2\text{CO}$  (in  $\text{C}_6\text{D}_6$ ; with FcH added), (b)  $\text{Ph}_2\text{C}=\text{NtBu}$  (in  $\text{Tol-d}_8$  and  $\text{C}_6\text{D}_6$ ; small amount of  $\text{Ph}_2\text{CO}$  added for comparison), (c)  $\text{Ph}_2\text{C}=\text{NAr}$  (in  $\text{Tol-d}_8$  and  $\text{C}_6\text{D}_6$ ).

## Reaction of $Zr(=NtBu)(Me_2Pyr)_2(py)_2$ (**1a**) with $Ph_2CO$

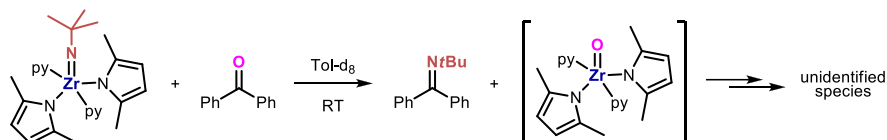

**Loading:** **1a** (15.6 mg, 30.7  $\mu$ mol),  $Ph_2CO$  (5.8 mg, 31.8  $\mu$ mol, 1.04 equiv/Zr), FcH (9.2 mg, 49.5  $\mu$ mol).

| Table S1 <sup>a</sup>   | 10 min           | 1 h              | 5 h              | 24 h | 3 days | 5 days | 7 days |
|-------------------------|------------------|------------------|------------------|------|--------|--------|--------|
| cmplx reacted           | 59%              | 74%              | 80%              | 89%  | 91%    | 92%    | 92%    |
| bph reacted/Zr          | 80%              | 97%              | 104%             | 104% | 104%   | 104%   | 104%   |
| imine formed/Zr         | 25%              | 32%              | 35%              | 37%  | 38%    | 36%    | 38%    |
| Me <sub>2</sub> PyrH/Zr | 4%               | 8%               | 12%              | 25%  | 39%    | 45%    | 48%    |
| py/Zr                   | n/d <sup>b</sup> | n/d <sup>b</sup> | n/d <sup>b</sup> | 98%  | 115%   | 107%   | 100%   |

<sup>a</sup> Values expressed in % relative to the initial amount of **1a**. <sup>b</sup> Difficult to integrate due to overlap.

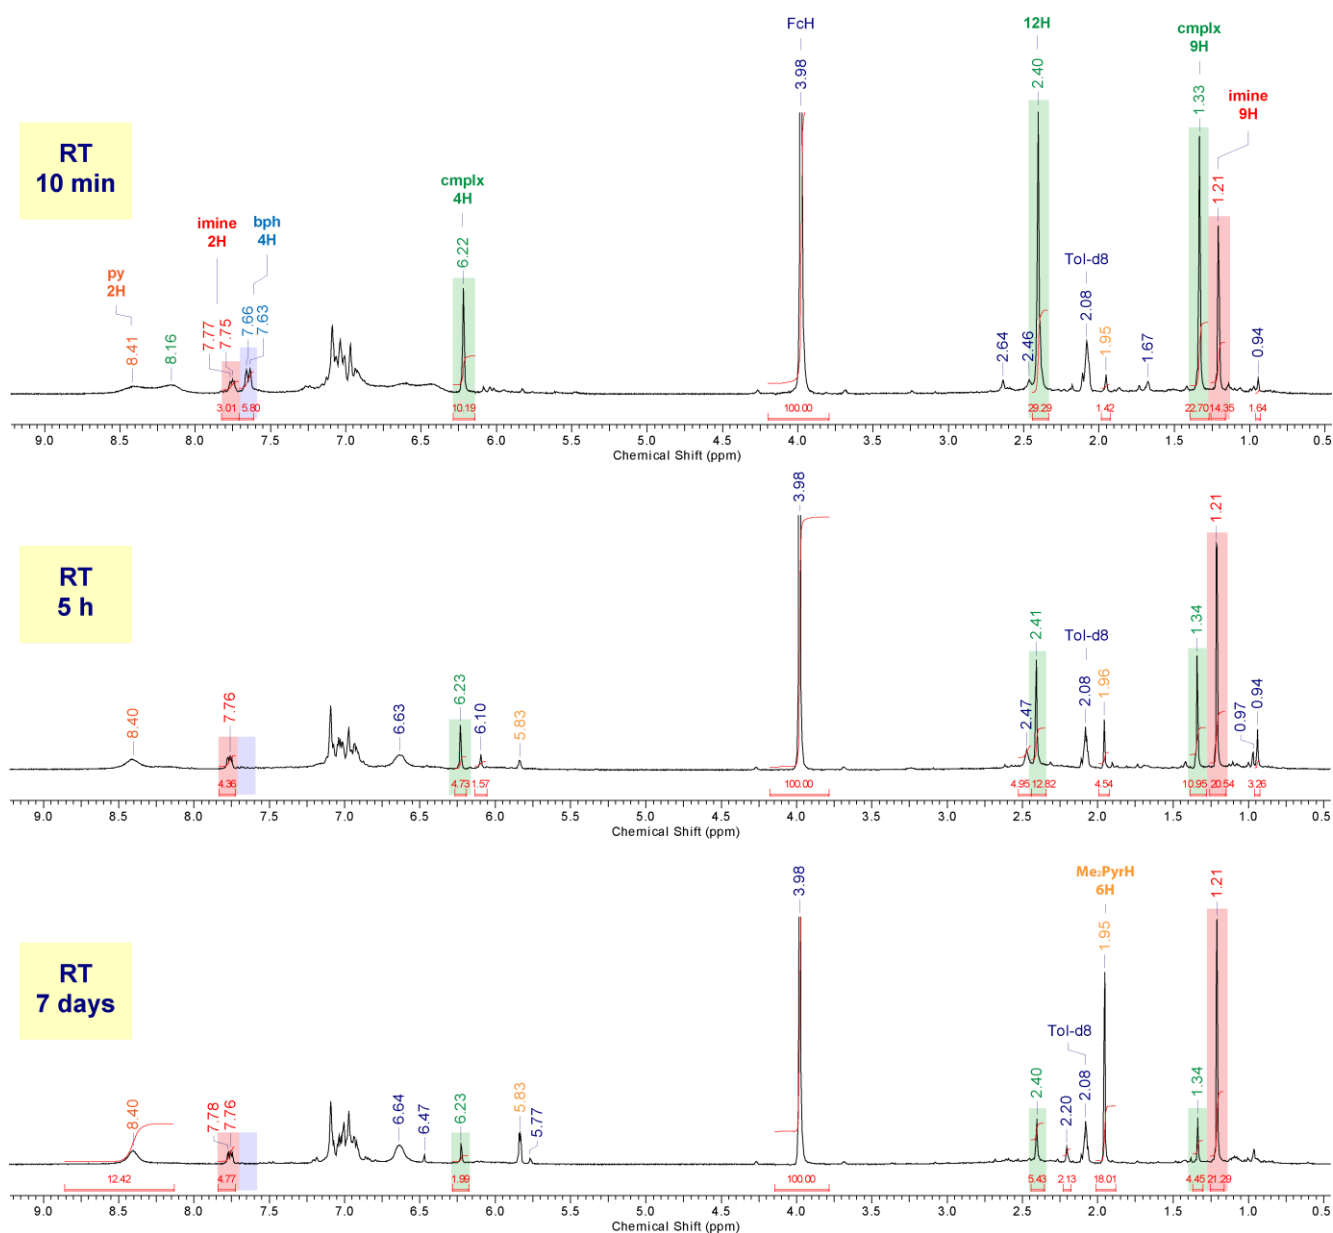

**Fig. S15.** Representative <sup>1</sup>H NMR spectra of the reaction of **1a** with  $Ph_2CO$ .

## Reaction of Ti(=NtBu)(Me<sub>2</sub>Pyr)<sub>2</sub>(py)<sub>2</sub> (2a) with Ph<sub>2</sub>CO

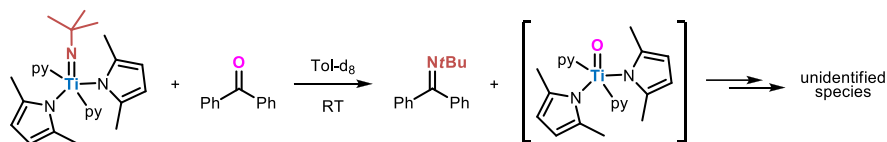

**Loading:** **2a** (14.1 mg, 30.3 μmol), Ph<sub>2</sub>CO (5.7 mg, 31.3 μmol, 1.03 equiv/Ti), FcH (10.3 mg, 55.4 μmol).

| Table S2 <sup>a</sup>   | 10 min           | 1 h              | 5 h              | 24 h | 3 days | 5 days | 7 days |
|-------------------------|------------------|------------------|------------------|------|--------|--------|--------|
| cmplx reacted           | 32%              | 51%              | 61%              | 84%  | 95%    | 97%    | 96%    |
| bph reacted/Ti          | 36%              | 42%              | 50%              | 71%  | 88%    | 97%    | 101%   |
| imine formed/Ti         | 1%               | 4%               | 11%              | 19%  | 26%    | 28%    | 29%    |
| Me <sub>2</sub> PyrH/Ti | 1%               | 2%               | 6%               | 14%  | 31%    | 37%    | 46%    |
| py/Ti                   | n/d <sup>b</sup> | n/d <sup>b</sup> | n/d <sup>b</sup> | 94%  | 111%   | 116%   | 118%   |

<sup>a</sup> Values expressed in % relative to the initial amount of **2a**. <sup>b</sup> Difficult to integrate due to overlap.

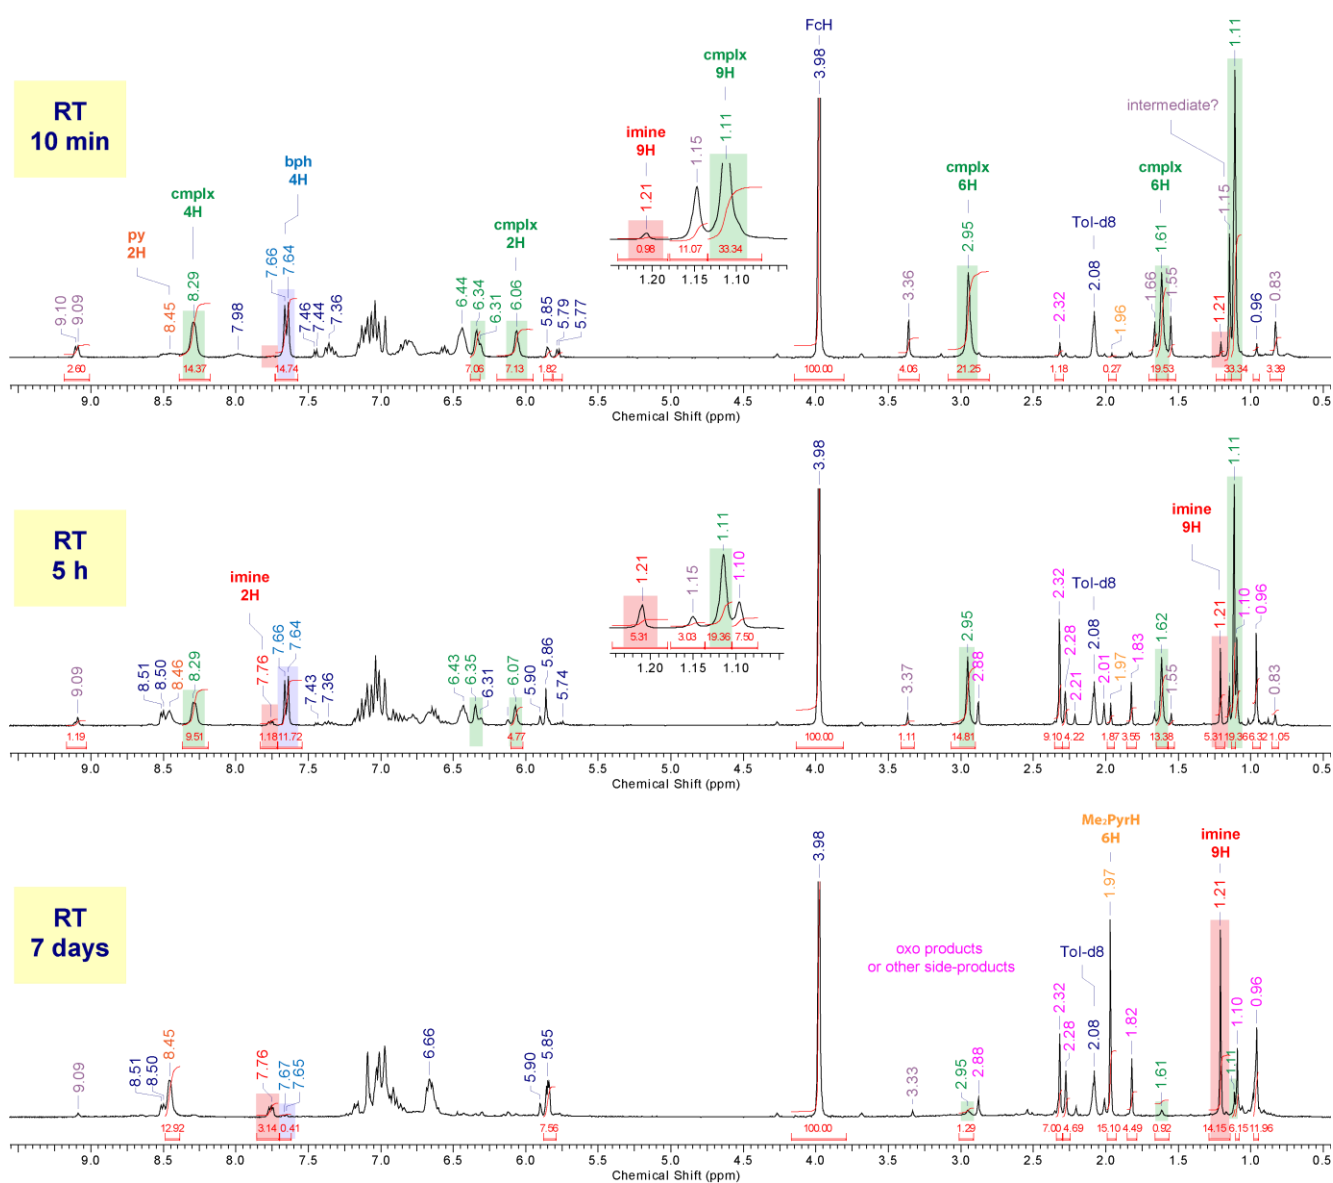

**Fig. S16.** Representative <sup>1</sup>H NMR spectra of the reaction of **2a** with Ph<sub>2</sub>CO.

## Reaction of $\text{Ti}(=\text{NtBu})(\text{OAr})_2(\text{py})_2$ (**2c**) with $\text{Ph}_2\text{CO}$

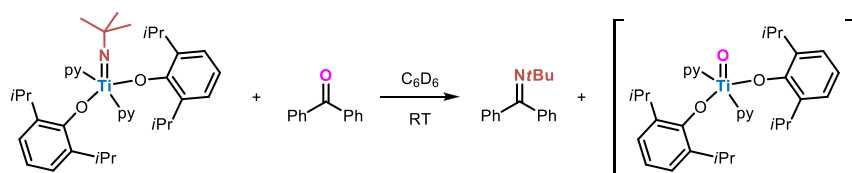

**Loading:** **2c** (23.5 mg, 37.2  $\mu\text{mol}$ ),  $\text{Ph}_2\text{CO}$  (8.0 mg, 43.9  $\mu\text{mol}$ , 1.18 equiv/Ti), FcH (13.6 mg, 73.1  $\mu\text{mol}$ ).

| Table S3 <sup>a</sup> | RT<br>1.5 h | RT<br>5 days | RT<br>11 days | RT<br>26 days |
|-----------------------|-------------|--------------|---------------|---------------|
| cmplx reacted         | 33%         | 72%          | 83%           | 88%           |
| bph reacted/Ti        | 20%         | 64%          | 76%           | 89%           |
| imine formed/Ti       | 17%         | 61%          | 70%           | 83%           |
| "Ti oxo" product      | 9%          | 49%          | 57%           | 80%           |

<sup>a</sup> Values expressed in % relative to the initial amount of **2c**.

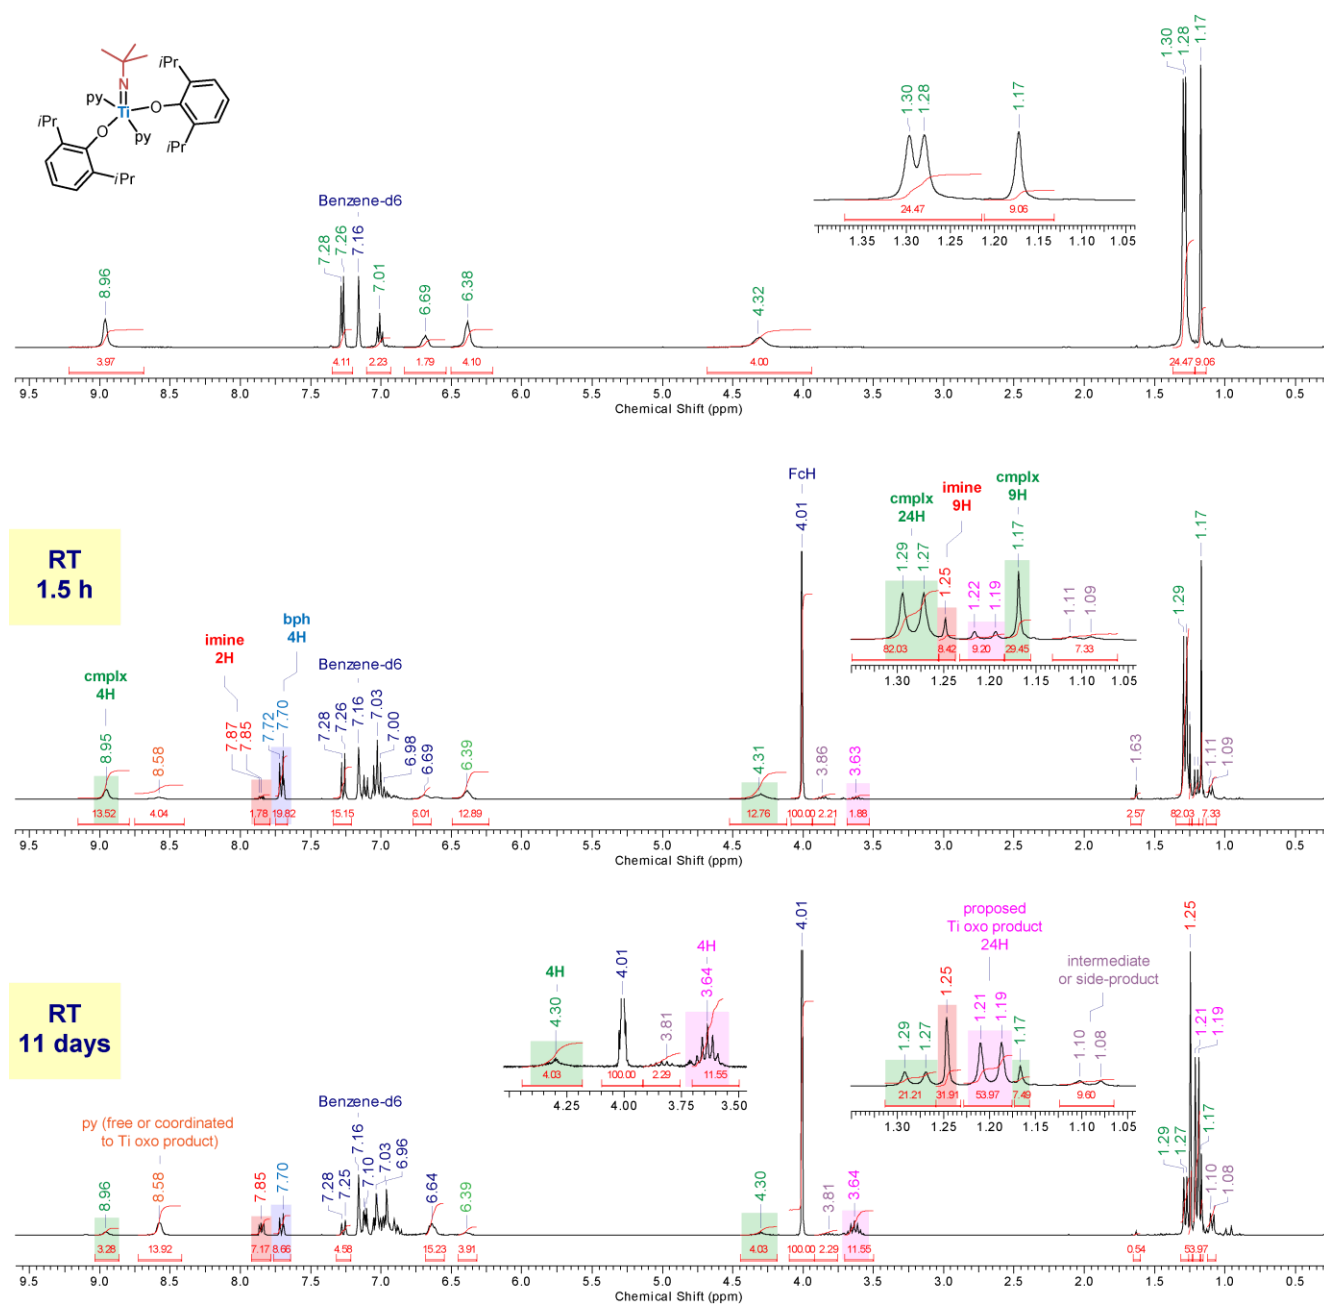

**Fig. S17.** Representative  $^1\text{H}$  NMR spectra of the reaction of **2c** with  $\text{Ph}_2\text{CO}$ .

## Reaction of Zr(=NAr)(Me<sub>2</sub>Pyr)<sub>2</sub>(py)<sub>2</sub> (**1b**) with Ph<sub>2</sub>CO

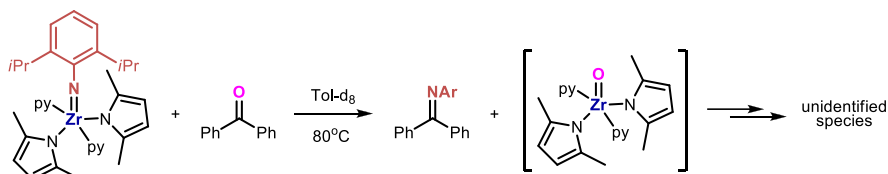

**Loading:** **1b** (13.6 mg, 22.2 μmol), Ph<sub>2</sub>CO (4.5 mg, 24.7 μmol, 1.11 equiv/Zr), FcH (11.3 mg, 60.7 μmol).

| Table S4 <sup>a</sup>   | RT<br>30 min | RT<br>24 h | 50°C<br>1 h | 80°C<br>1 h | 80°C<br>1 day | 80°C<br>2 days | 80°C<br>3 days |
|-------------------------|--------------|------------|-------------|-------------|---------------|----------------|----------------|
| cmplx reacted           | 4%           | 26%        | 28%         | 37%         | 64%           | 67%            | 69%            |
| bph reacted/Zr          | -            | 22%        | 31%         | 50%         | 105%          | 111%           | 111%           |
| imine formed/Zr         | -            | 4%         | 10%         | 19%         | 36%           | 38%            | 38%            |
| Me <sub>2</sub> PyrH/Zr | 5%           | 10%        | 15%         | 23%         | 46%           | 52%            | 55%            |
| py/Zr                   | 13%          | 21%        | 30%         | 53%         | 87%           | 92%            | 100%           |

<sup>a</sup> Values expressed in % relative to the initial amount of **1b**.

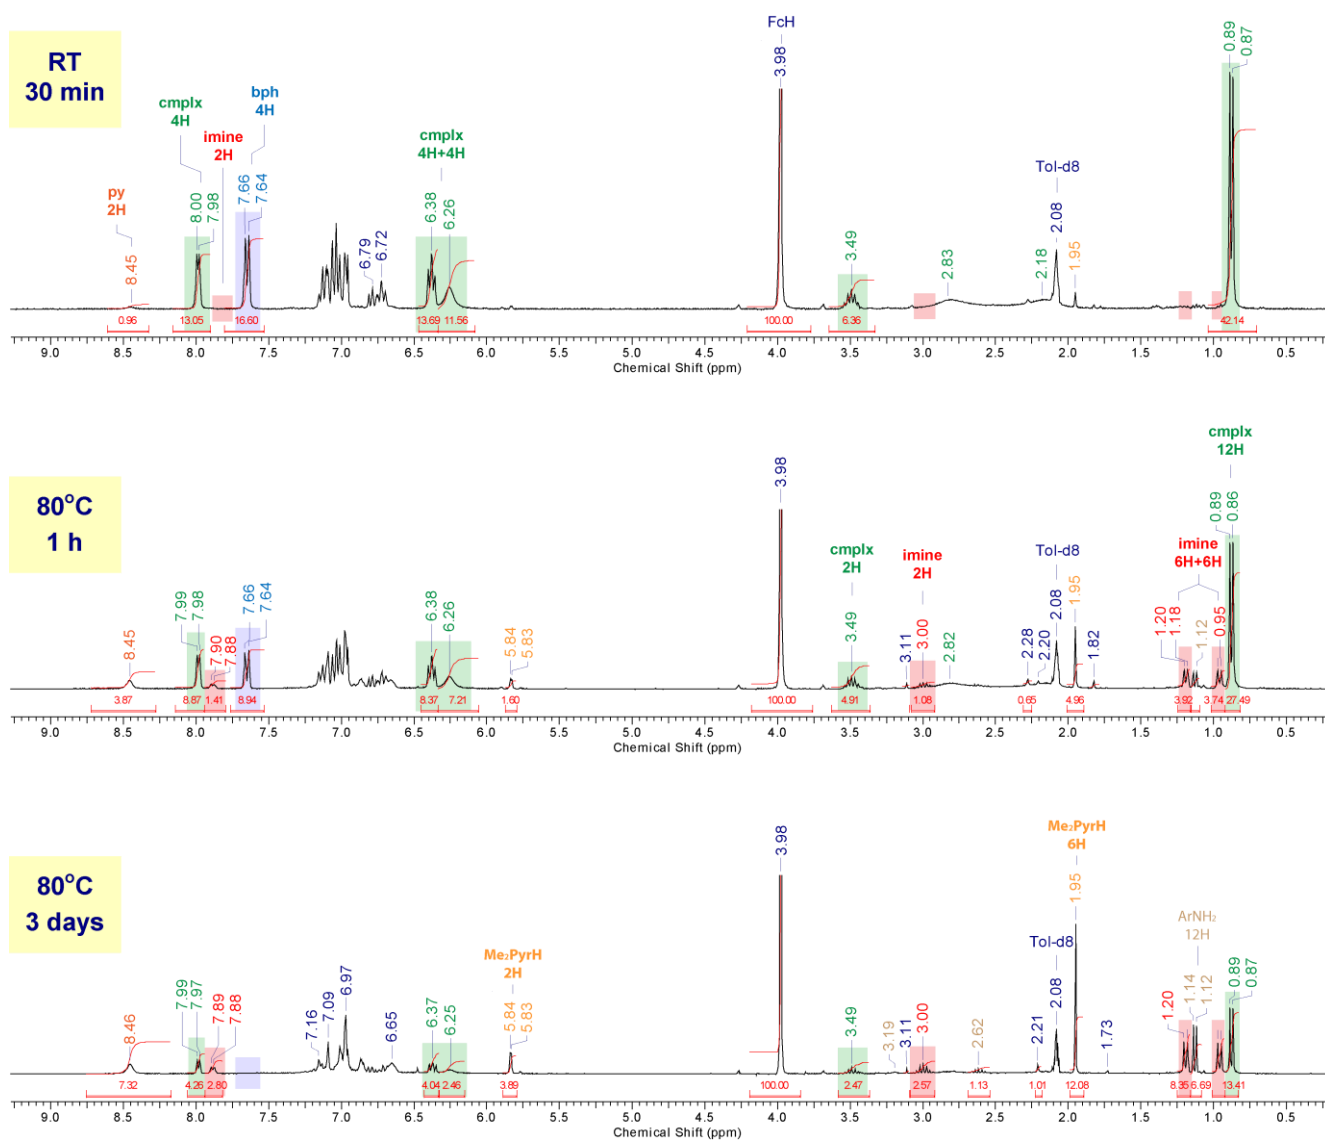

**Fig. S18.** Representative <sup>1</sup>H NMR spectra of the reaction of **1b** with Ph<sub>2</sub>CO.

## Reaction of $\text{Ti}(=\text{NAr})(\text{Me}_2\text{Pyr})_2(\text{py})_2$ (**2b**) with $\text{Ph}_2\text{CO}$

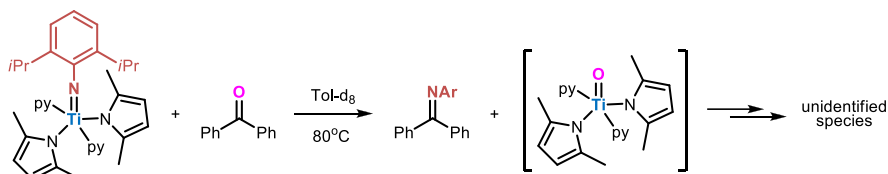

**Loading:** **2b** (12.3 mg, 21.6  $\mu\text{mol}$ ),  $\text{Ph}_2\text{CO}$  (4.2 mg, 23.0  $\mu\text{mol}$ , 1.06 equiv/Ti), FcH (11.4 mg, 61.3  $\mu\text{mol}$ ).

| Table S5 <sup>a</sup>              | RT<br>30 min | RT<br>24 h | 50°C<br>1 h | 80°C<br>1 h | 80°C<br>1 day | 80°C<br>2 days | 80°C<br>3 days |
|------------------------------------|--------------|------------|-------------|-------------|---------------|----------------|----------------|
| cmplx reacted                      | 28%          | 30%        | 27%         | 34%         | 57%           | 65%            | 72%            |
| bph reacted/Ti                     | 17%          | 19%        | 18%         | 21%         | 61%           | 76%            | 87%            |
| imine formed/Ti                    | -            | -          | -           | 6%          | 21%           | 27%            | 31%            |
| $\text{Me}_2\text{PyrH}/\text{Ti}$ | 1%           | 2%         | 3%          | 6%          | 38%           | 52%            | 60%            |
| $\text{py}/\text{Ti}$              | 20%          | 20%        | 21%         | 23%         | 59%           | 73%            | 83%            |

<sup>a</sup> Values expressed in % relative to the initial amount of **2b**.

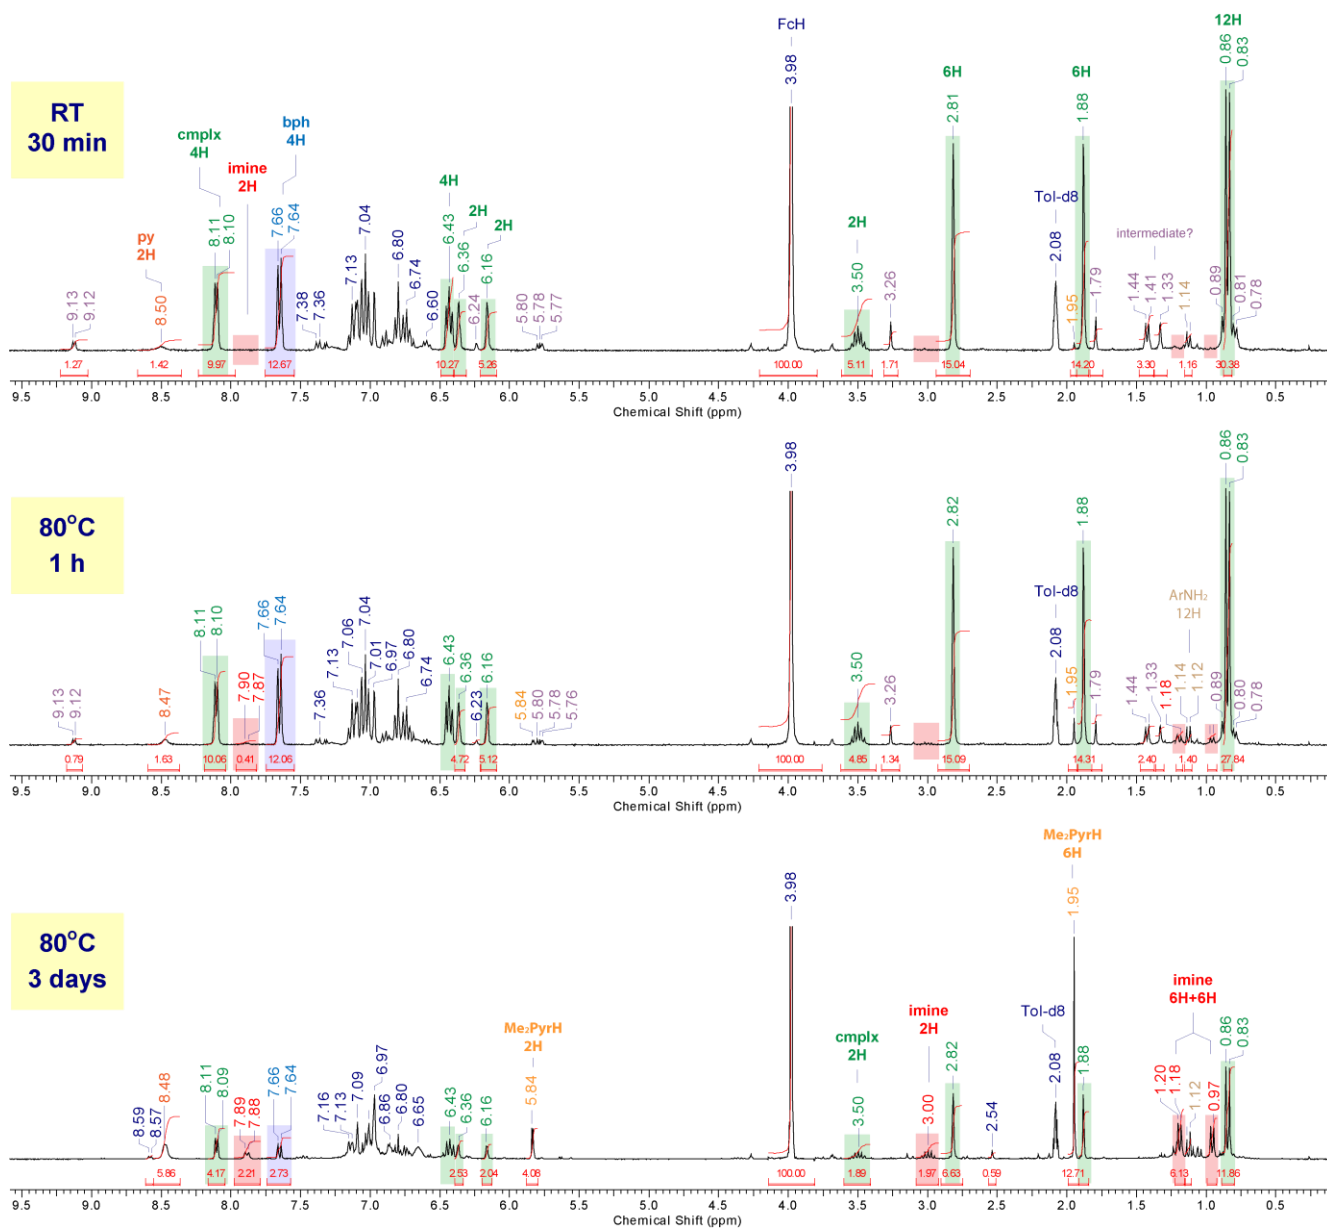

**Fig. S19.** Representative  $^1\text{H}$  NMR spectra of the reaction of **2b** with  $\text{Ph}_2\text{CO}$ .

## Observation of the intermediate in the reaction of $\text{Ti}(\text{=NAr})(\text{Me}_2\text{Pyr})_2(\text{py})_2$ (**2b**) with $\text{Ph}_2\text{CO}$

When **2b** is treated with excess  $\text{Ph}_2\text{CO}$  (4–5 equiv) the concentration of the intermediate can be increased by *in situ* removal of pyridine *via* several consecutive evaporation/redissolution cycles. This allowed us to characterize the intermediate (that we propose to be a coordination adduct or a metallacycle resulting from [2+2] cycloaddition of  $\text{Ph}_2\text{CO}$  across  $\text{Ti}=\text{NAr}$  bond) with  $^1\text{H}$  NMR spectroscopy, but only in the presence of excess  $\text{Ph}_2\text{CO}$ . Unfortunately, the attempts to remove benzophenone, isolate and further characterize this species led to decomposition. The intermediate possesses lower symmetry than the initial complex **2b**, which is manifested in the appearance of 4 distinct resonances of pyrrolyl methyl groups and 2 doublets for  $\text{CHMe}_2$  groups, although this information is still not sufficient to make final assignment.

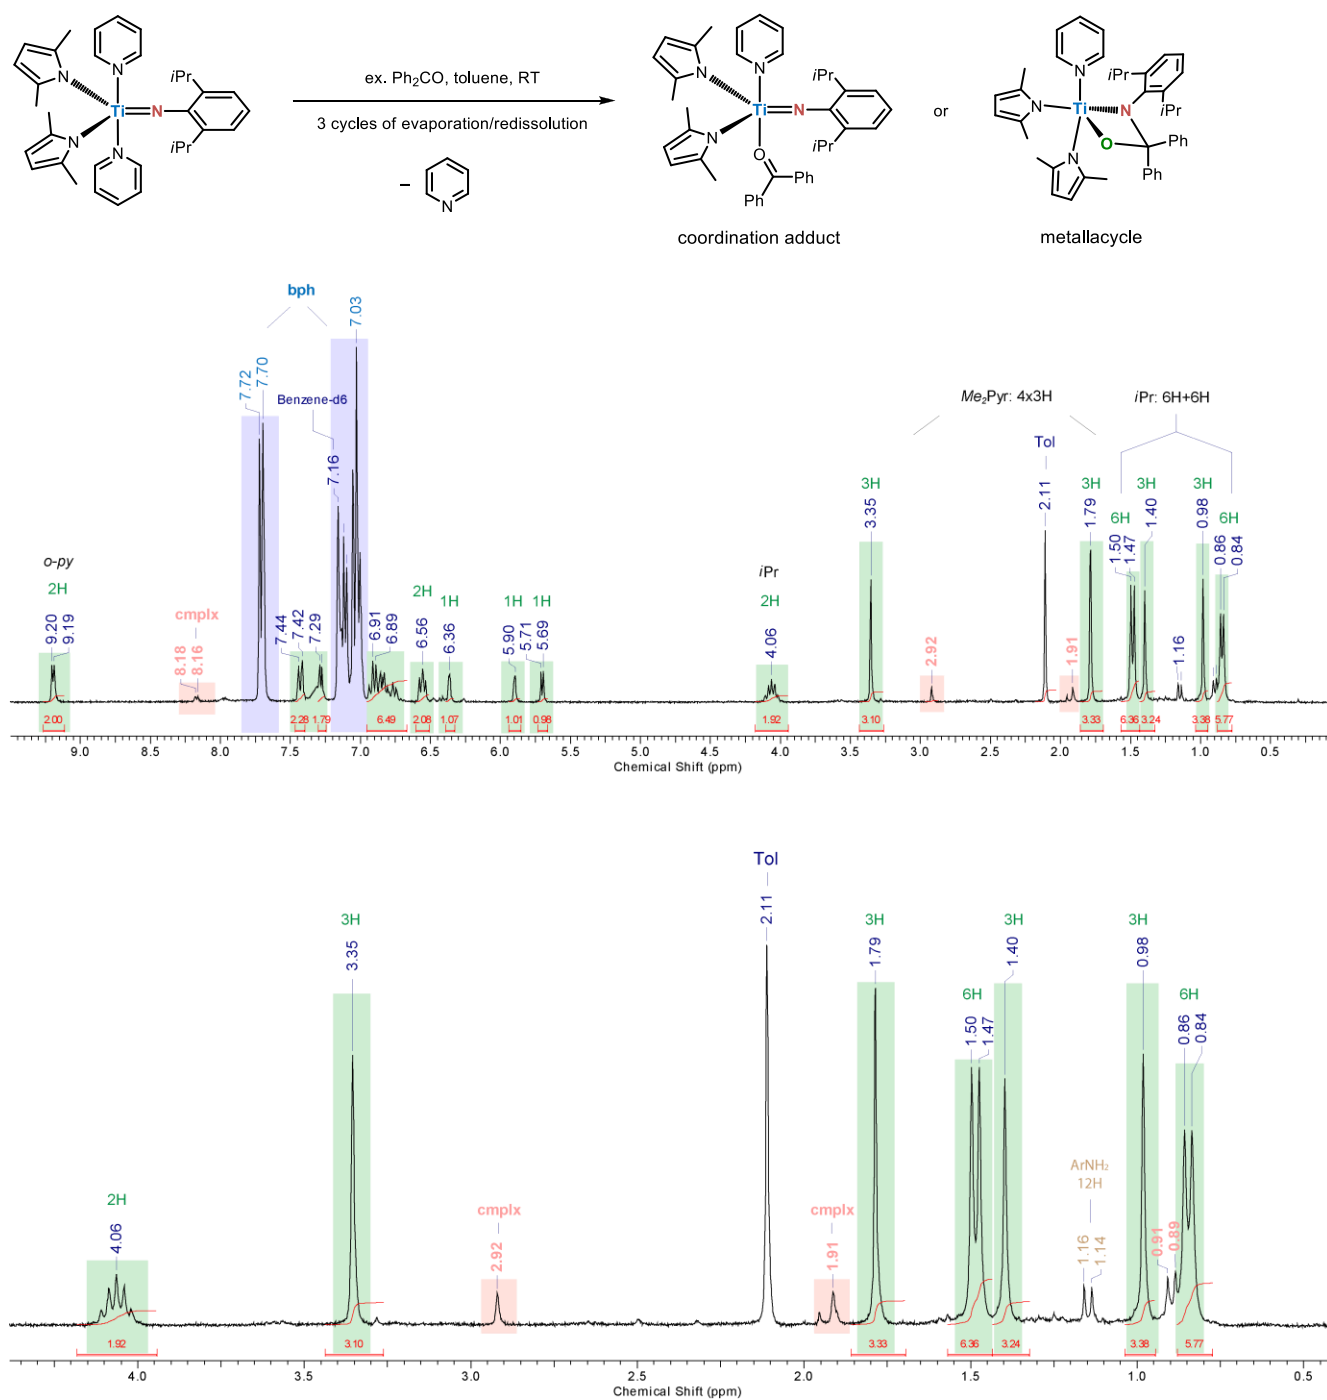

Fig. S20.  $^1\text{H}$  NMR spectrum of the intermediate observed in the reaction between **2b** and  $\text{Ph}_2\text{CO}$ .



## Reactions of grafted complexes with Ph<sub>2</sub>CO

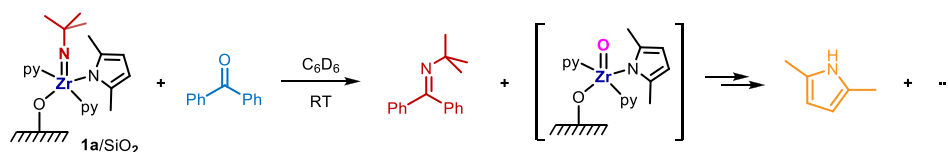

**Loading:** 1a/SiO<sub>2</sub> (17.0 mg, 3.9 μmol), Ph<sub>2</sub>CO (3.2 mg, 17.6 μmol, 4.5 equiv/Zr), FcH (13.2 mg, 71.0 μmol).

| Table S6 <sup>a</sup>                   | 1 h | 24 h | 3 days | 4 days | 6 days |
|-----------------------------------------|-----|------|--------|--------|--------|
| bph reacted/Zr <sub>surf</sub>          | 51% | 102% | 124%   | 119%   | 115%   |
| imine formed/Zr <sub>surf</sub>         | 27% | 39%  | 45%    | 47%    | 48%    |
| Me <sub>2</sub> PyrH/Zr <sub>surf</sub> | 8%  | 23%  | 38%    | 42%    | 48%    |

<sup>a</sup> Values expressed in % relative to the total amount of Zr<sub>surf</sub>.

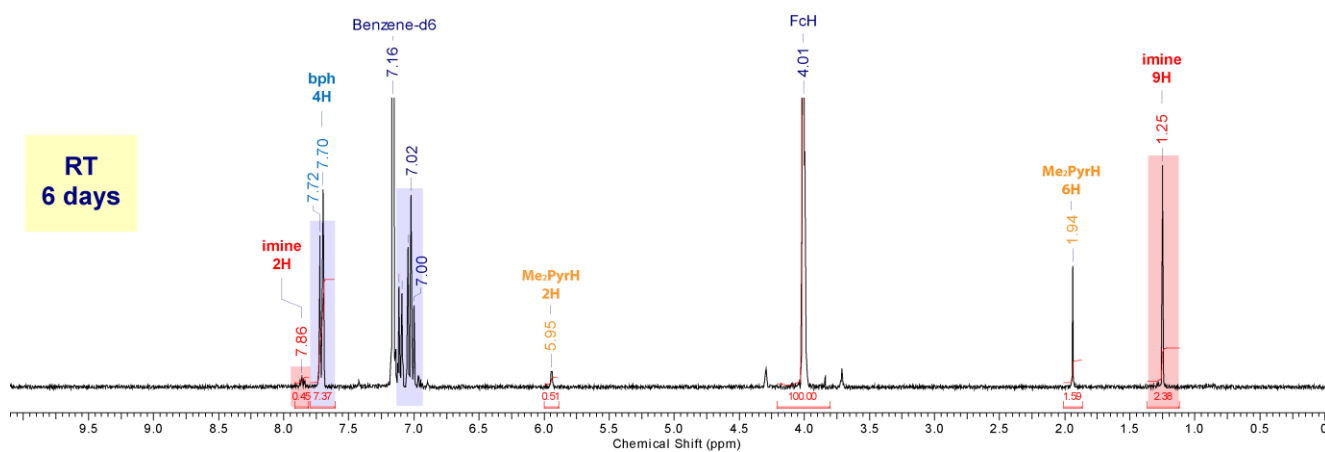

**Fig. S21.** Representative <sup>1</sup>H NMR spectrum of the reaction of 1a/SiO<sub>2</sub> with Ph<sub>2</sub>CO.

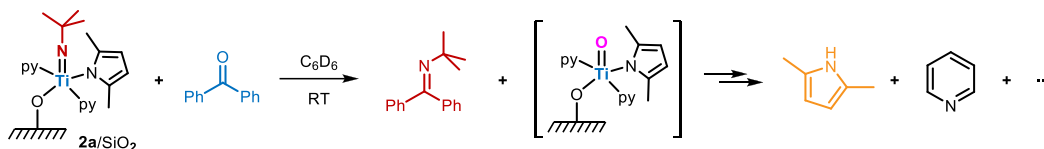

**Loading:** **2a/SiO<sub>2</sub>** (16.7 mg, 3.8 μmol), **Ph<sub>2</sub>CO** (2.6 mg, 14.3 μmol, 3.8 equiv/Ti), **FcH** (9.2 mg, 49.5 μmol).

| <b>Table S7<sup>a</sup></b>                 | <b>1 h</b> | <b>24 h</b> | <b>3 days</b> | <b>4 days</b> | <b>6 days</b> |
|---------------------------------------------|------------|-------------|---------------|---------------|---------------|
| <b>bph reacted/Ti<sub>surf</sub></b>        | <b>56%</b> | <b>108%</b> | <b>134%</b>   | <b>133%</b>   | <b>145%</b>   |
| <b>imine formed/Ti<sub>surf</sub></b>       | <b>21%</b> | <b>57%</b>  | <b>67%</b>    | <b>72%</b>    | <b>74%</b>    |
| <b>Me<sub>2</sub>PyrH/Ti<sub>surf</sub></b> | <b>30%</b> | <b>44%</b>  | <b>49%</b>    | <b>50%</b>    | <b>50%</b>    |

<sup>a</sup> Values expressed in % relative to the total amount of Ti<sub>surf</sub>.

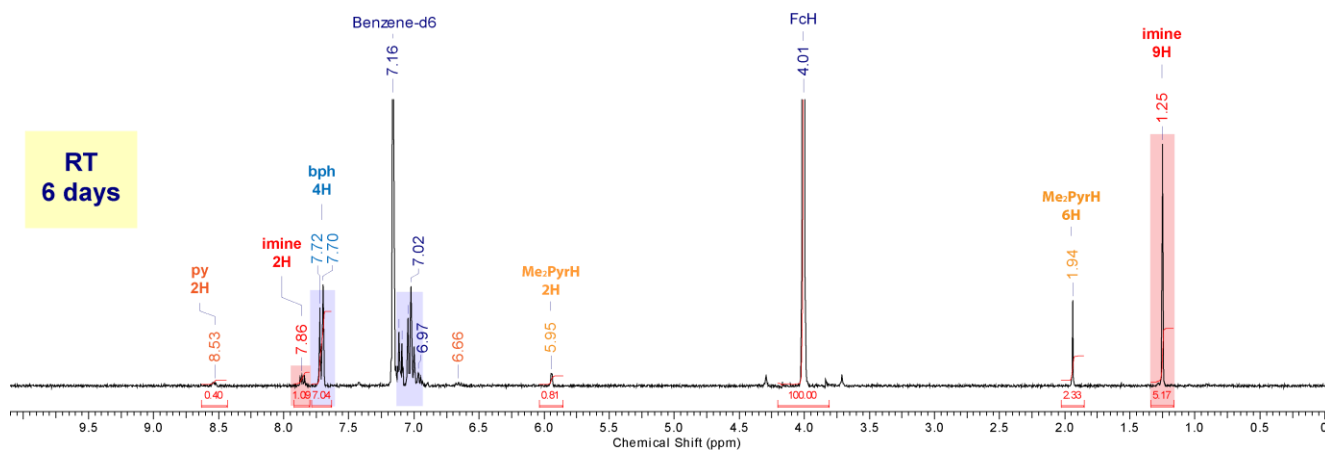

**Fig. S22.** Representative <sup>1</sup>H NMR spectra of the reaction of **2a/SiO<sub>2</sub>** with **Ph<sub>2</sub>CO**.

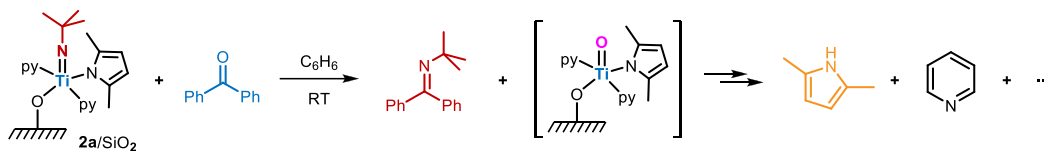

The reaction was repeated on a larger scale (104 mg **2a/SiO<sub>2</sub>** and 22.5 mg  $\text{Ph}_2\text{CO}$ ). After the reaction the solid was washed with  $\text{C}_6\text{H}_6$ , dried in high vacuum and analyzed with IR (**Fig. S23**) and solid-state NMR (**Fig. S24, S25**).

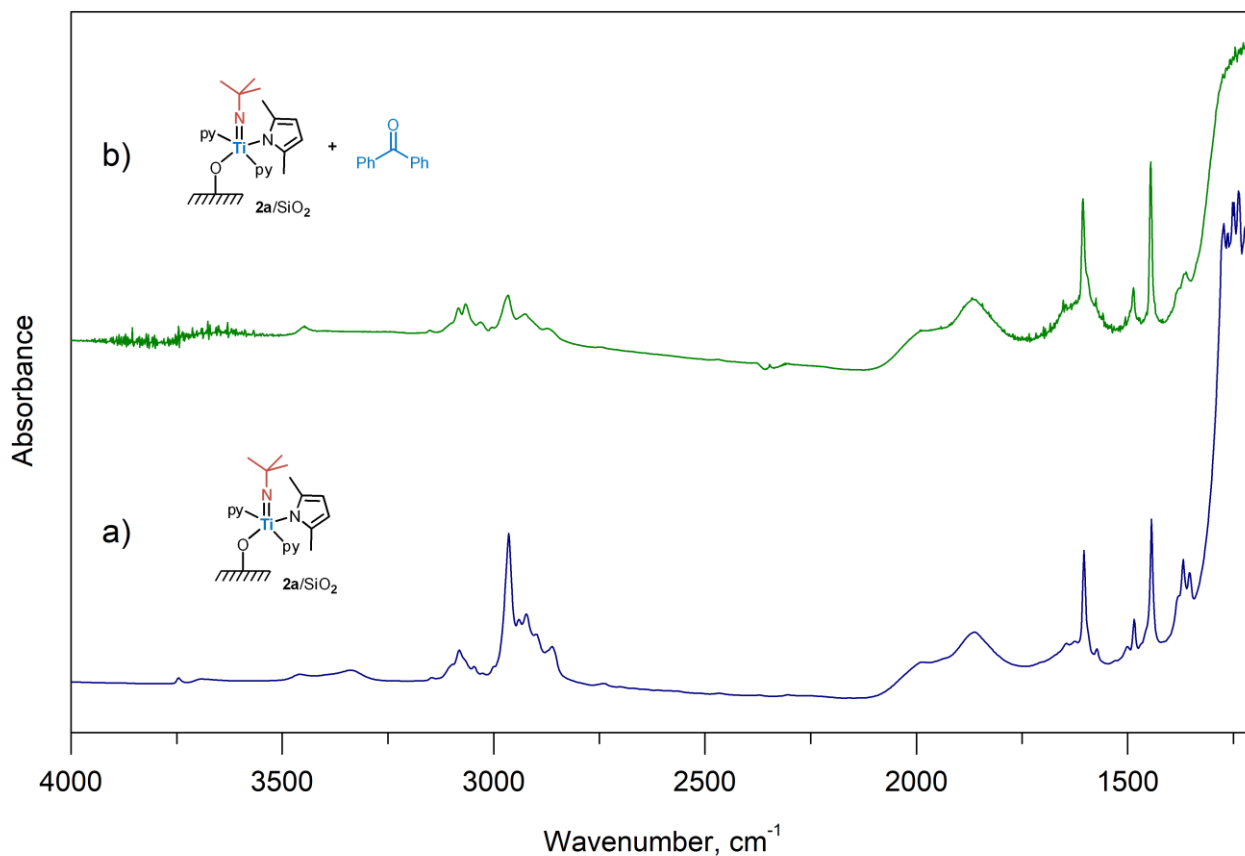

**Fig. S23.** IR spectra of (a) **2a/SiO<sub>2</sub>**, and (b) **2a/SiO<sub>2</sub>** after the reaction with  $\text{Ph}_2\text{CO}$ . Spectrum (b) was recorded at Shimadzu IRTracer-100 instrument operated in air; the sample was pressed into a pellet inside a glovebox and transferred to the spectrometer in a home-made air-tight cell.

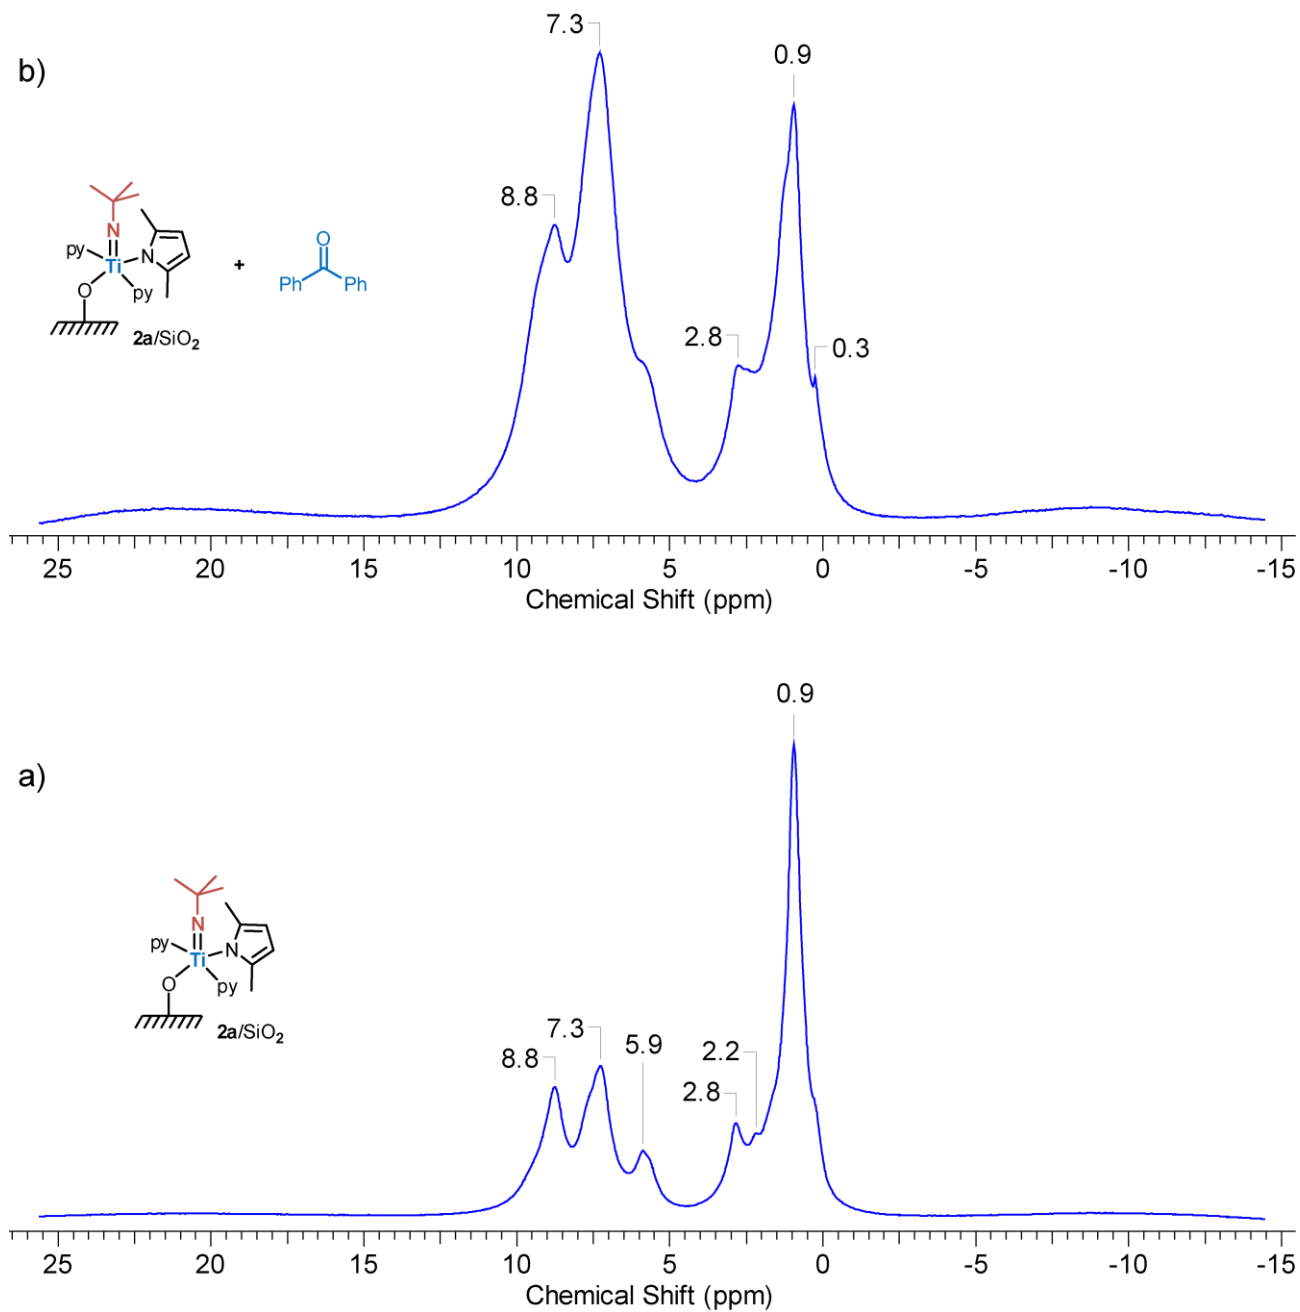

**Fig. S24.**  $^1\text{H}$  MAS solid-state NMR spectra of (a) **2a**/ $\text{SiO}_2$  (400 MHz; 14 kHz MAS), and (b) **2a**/ $\text{SiO}_2$  after the reaction with  $\text{Ph}_2\text{CO}$  (400 MHz; 12 kHz MAS).

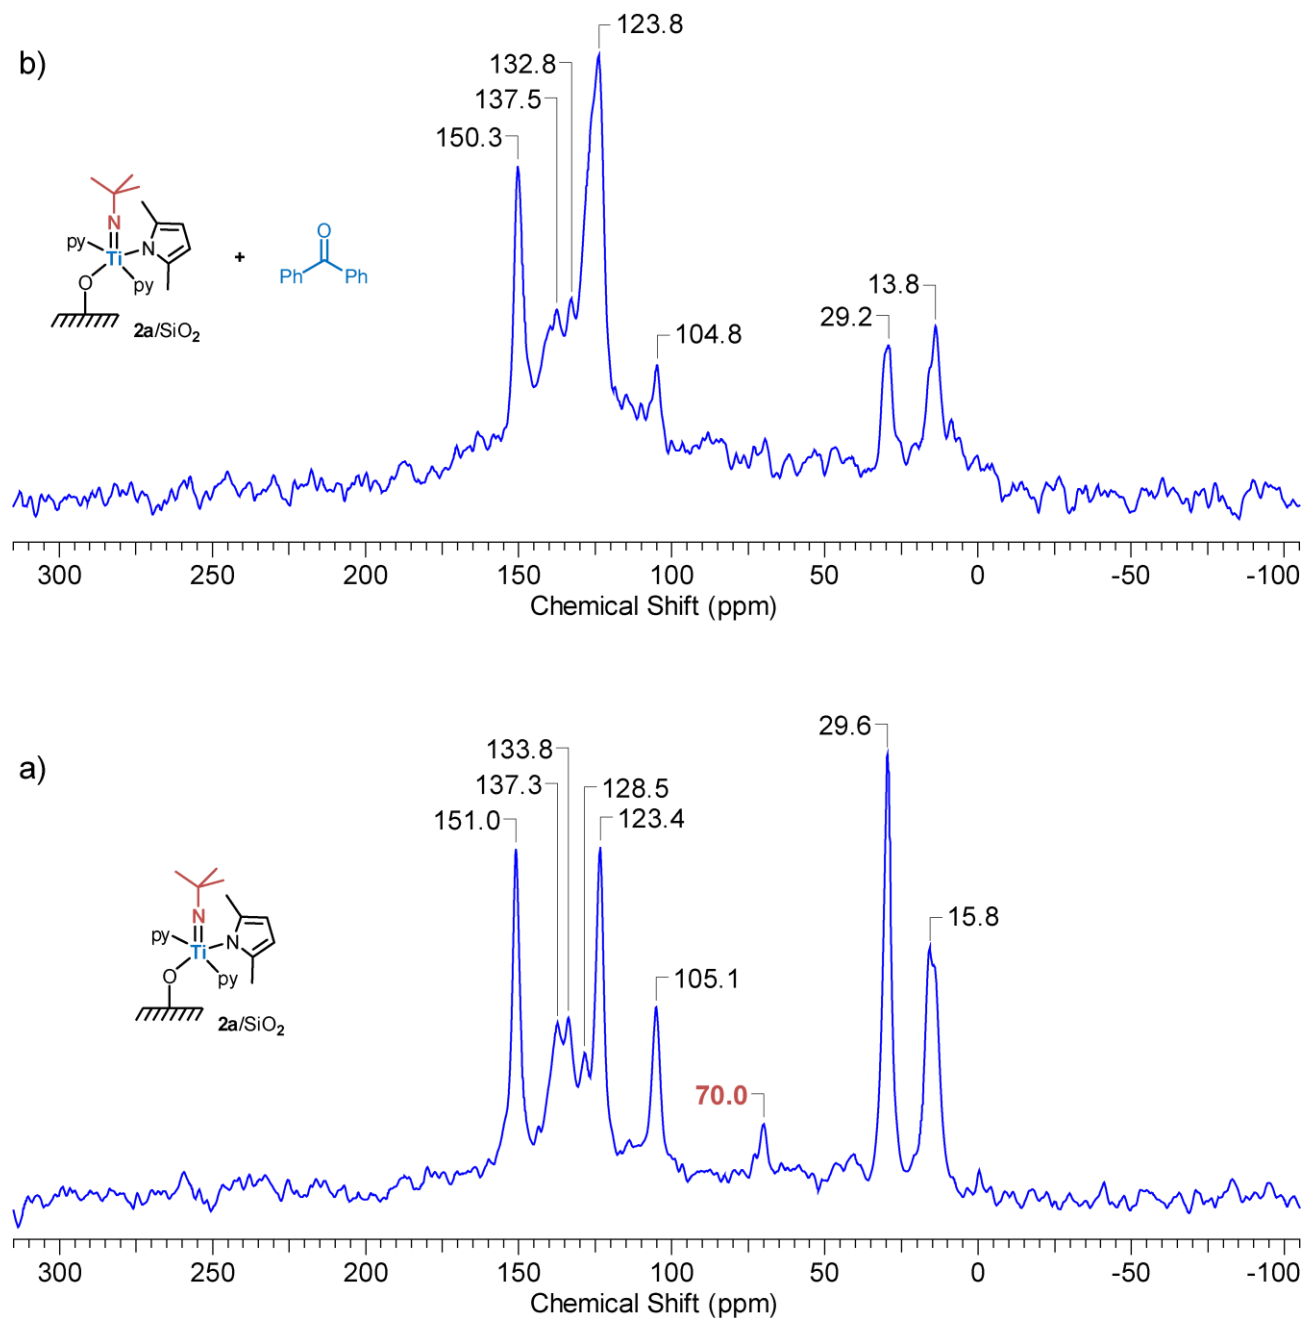

**Fig. S25.**  $^{13}\text{C}$  CP MAS solid-state NMR spectra of (a) **2a**/ $\text{SiO}_2$  (100 MHz; 11 kHz MAS; CP contact time 3 ms; recycle delay 2.5 s; 19'000 scans), and (b) **2a**/ $\text{SiO}_2$  after the reaction with  $\text{Ph}_2\text{CO}$  (100 MHz; 12 kHz MAS; CP contact time 4 ms; recycle delay 2 s; 24'000 scans).

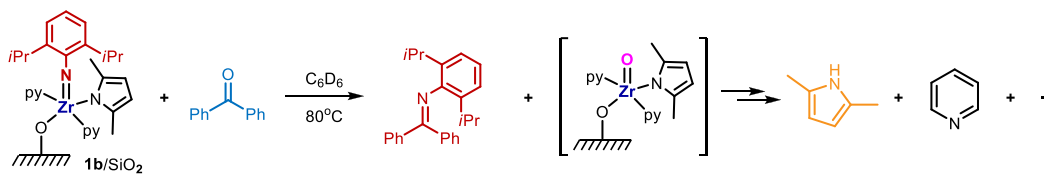

**Loading:** **1b**/SiO<sub>2</sub> (14.8 mg, 3.2 μmol), Ph<sub>2</sub>CO (1.9 mg, 10.4 μmol, 3.3 equiv/Zr), FcH (9.4 mg, 50.5 μmol).

| Table S8 <sup>a</sup>                       | RT, 1 h    | RT, 24 h   | 80°C, 24 h  |
|---------------------------------------------|------------|------------|-------------|
| <b>bph reacted/Zr<sub>surf</sub></b>        | <b>44%</b> | <b>80%</b> | <b>164%</b> |
| <b>imine formed/Zr<sub>surf</sub></b>       | -          | <b>30%</b> | <b>69%</b>  |
| <b>Me<sub>2</sub>PyrH/Zr<sub>surf</sub></b> | <b>4%</b>  | <b>10%</b> | <b>26%</b>  |

<sup>a</sup> Values expressed in % relative to the total amount of Zr<sub>surf</sub>.

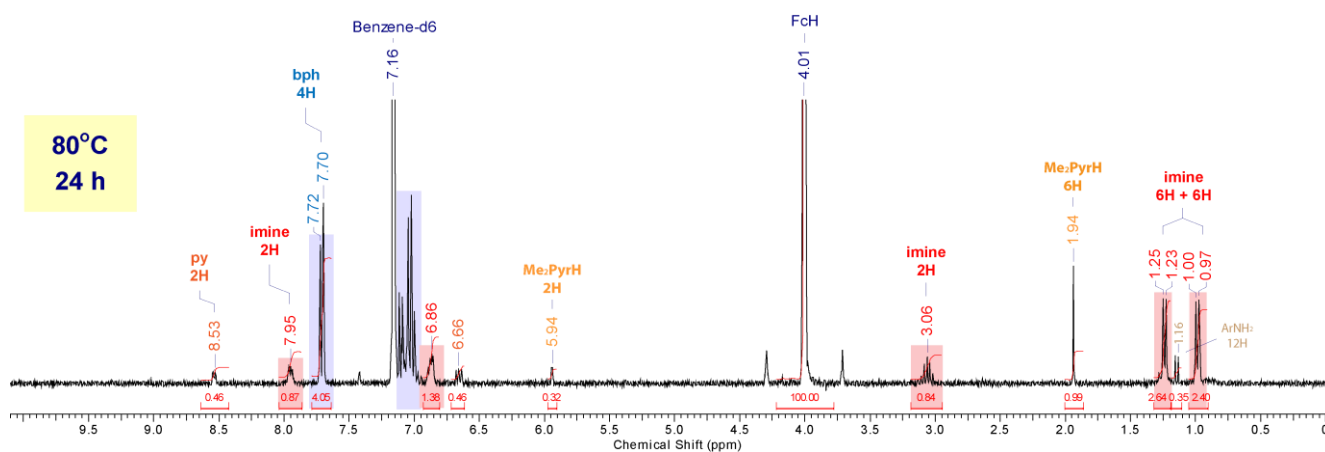

**Fig. S26.** Representative <sup>1</sup>H NMR spectra of the reaction of **1b**/SiO<sub>2</sub> with Ph<sub>2</sub>CO.

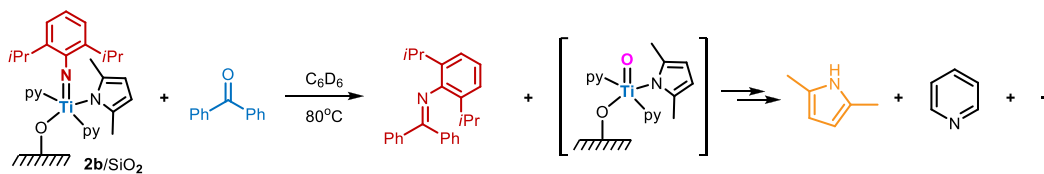

**Loading:** 2b/SiO<sub>2</sub> (14.3 mg, 3.2 μmol), Ph<sub>2</sub>CO (2.9 mg, 15.9 μmol, 5.0 equiv/Ti), FcH (9.5 mg, 51.1 μmol).

| Table S9 <sup>a</sup>                   | RT, 1 h | RT, 24 h | 80°C, 24 h |
|-----------------------------------------|---------|----------|------------|
| bph reacted/Ti <sub>surf</sub>          | -       | 3%       | 146%       |
| imine formed/Ti <sub>surf</sub>         | -       | 15%      | 91%        |
| Me <sub>2</sub> PyrH/Ti <sub>surf</sub> | 8%      | 14%      | 26%        |

<sup>a</sup> Values expressed in % relative to the total amount of Ti<sub>surf</sub>.

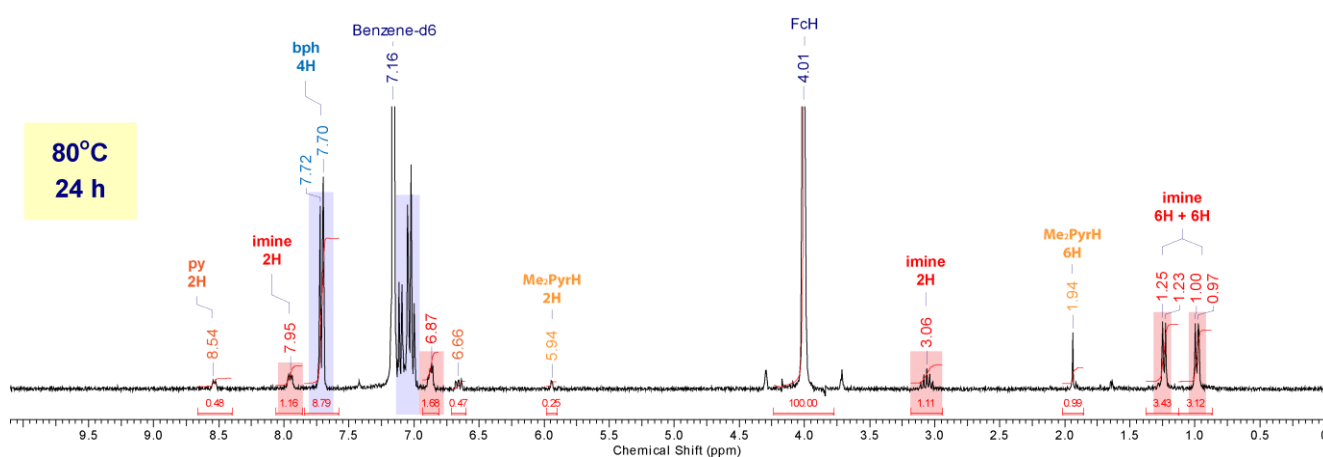

**Fig. S27.** Representative <sup>1</sup>H NMR spectra of the reaction of 2b/SiO<sub>2</sub> with Ph<sub>2</sub>CO.

## Computational Details

Computational studies were carried out at Euler Cluster of ETH Zürich. DFT calculations were performed with the Gaussian09 (revision D.01) package<sup>[2]</sup> using the PBE0 functional,<sup>[3]</sup> Def2-TZVP<sup>[4, 5]</sup> basis set for non-metal atoms and SDD functional with the corresponding effective core potential for Ti and Zr.<sup>[6]</sup> Natural population analysis was performed with NBO 5.9 integrated in Gaussian.<sup>[7]</sup> MO images were created in GaussView 6.0. All images are Kohn-Sham orbitals at isovalue 0.05. MO compositions were analyzed in Chemissian<sup>[8]</sup> using scheme “simple” (*i.e.* with AO contributions estimated as  $C_i^2 / \sum C_j^2$ ).



## Molecular Orbitals

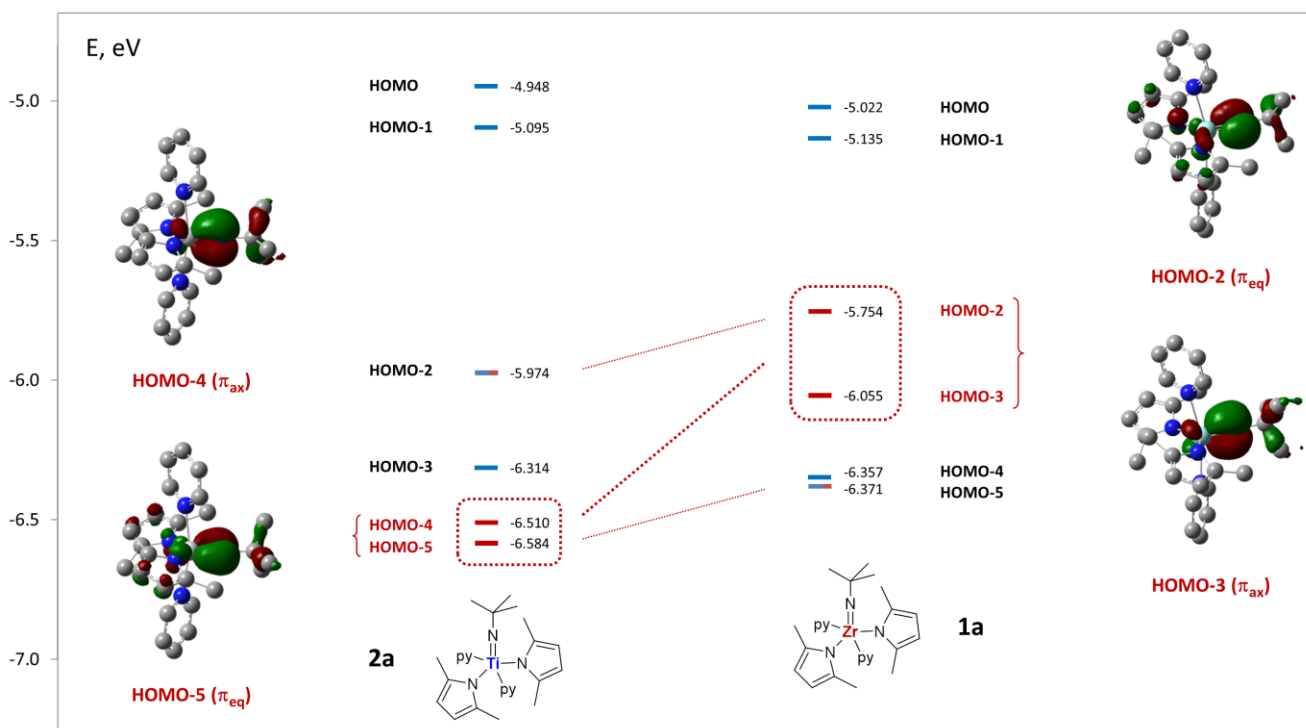

Fig. S28. Highest occupied molecular orbitals of Ti and Zr complexes **2a** and **1a**.

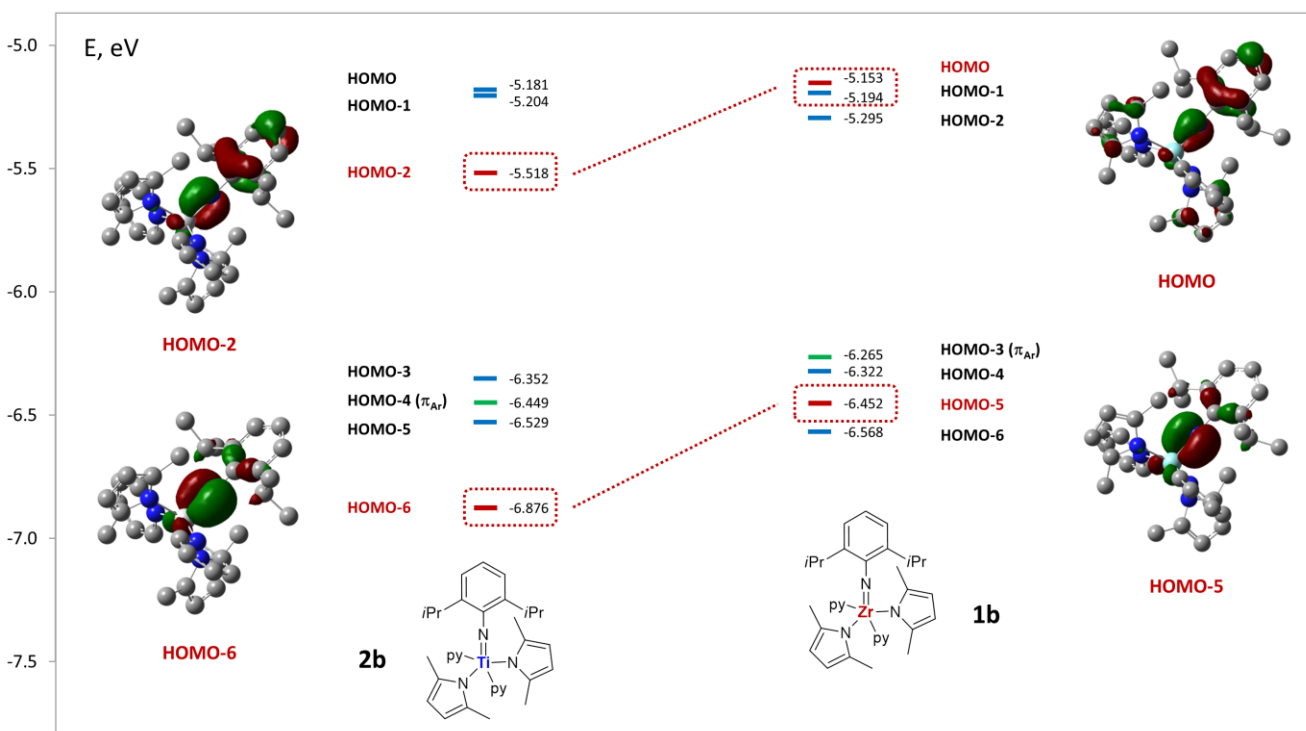

Fig. S29. Highest occupied molecular orbitals of Ti and Zr complexes **2b** and **1b**.

**Table S10.** Compositions and shapes of selected molecular orbitals of complexes **1a** and **2a**.

| 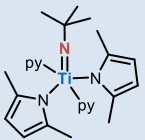<br>$\text{Ti}(=\text{NtBu})(\text{Me}_2\text{Pyr})_2(\text{py})_2$ ( <b>2a</b> ) |        |        |                    |     |                     |       |     | <br>$\text{Zr}(=\text{NtBu})(\text{Me}_2\text{Pyr})_2(\text{py})_2$ ( <b>1a</b> ) |        |        |                    |     |                     |       |     |
|--------------------------------------------------------------------------------------------------------------------------------------------------------------------|--------|--------|--------------------|-----|---------------------|-------|-----|---------------------------------------------------------------------------------------------------------------------------------------------------------------------|--------|--------|--------------------|-----|---------------------|-------|-----|
| MO                                                                                                                                                                 | E, eV  | Ti     | N <sub>imido</sub> | tBu | Me <sub>2</sub> Pyr | other |     | MO                                                                                                                                                                  | E, eV  | Zr     | N <sub>imido</sub> | tBu | Me <sub>2</sub> Pyr | other |     |
| <b>119</b>                                                                                                                                                         | HOMO   | -4.948 | 3%                 | -   | -                   | 95%   | 2%  | <b>119</b>                                                                                                                                                          | HOMO   | -5.022 | 2%                 | -   | -                   | 97%   | 1%  |
| <b>118</b>                                                                                                                                                         | HOMO-1 | -5.095 | 1%                 | -   | -                   | 97%   | 2%  | <b>118</b>                                                                                                                                                          | HOMO-1 | -5.135 | 2%                 | -   | -                   | 96%   | 2%  |
| <b>117</b>                                                                                                                                                         | HOMO-2 | -5.974 | 6%                 | 12% | 5%                  | 67%   | 10% | <b>117</b>                                                                                                                                                          | HOMO-2 | -5.754 | 12%                | 27% | 10%                 | 47%   | 4%  |
| <b>116</b>                                                                                                                                                         | HOMO-3 | -6.314 | 11%                | 1%  | 1%                  | 80%   | 7%  | <b>116</b>                                                                                                                                                          | HOMO-3 | -6.055 | 23%                | 39% | 15%                 | 14%   | 9%  |
| <b>115</b>                                                                                                                                                         | HOMO-4 | -6.510 | 30%                | 43% | 17%                 | 3%    | 7%  | <b>115</b>                                                                                                                                                          | HOMO-4 | -6.357 | 13%                | -   | -                   | 77%   | 10% |
| <b>114</b>                                                                                                                                                         | HOMO-5 | -6.584 | 21%                | 31% | 13%                 | 30%   | 5%  | <b>114</b>                                                                                                                                                          | HOMO-5 | -6.371 | 10%                | 10% | 5%                  | 65%   | 11% |

  

|                                                                                     |                                                                                     |                                                                                      |                                                                                       |
|-------------------------------------------------------------------------------------|-------------------------------------------------------------------------------------|--------------------------------------------------------------------------------------|---------------------------------------------------------------------------------------|
|    |    |    |    |
| <b>119 (HOMO)</b>                                                                   | <b>118 (HOMO-1)</b>                                                                 | <b>119 (HOMO)</b>                                                                    | <b>118 (HOMO-1)</b>                                                                   |
|  |  |  |  |
| <b>117 (HOMO-2)</b>                                                                 | <b>116 (HOMO-3)</b>                                                                 | <b>117 (HOMO-2)</b>                                                                  | <b>116 (HOMO-3)</b>                                                                   |
|  |  |  |  |
| <b>115 (HOMO-4)</b>                                                                 | <b>114 (HOMO-5)</b>                                                                 | <b>115 (HOMO-4)</b>                                                                  | <b>114 (HOMO-5)</b>                                                                   |

**Table S11.** Compositions and shapes of selected molecular orbitals of complexes **1b** and **2b**.

| 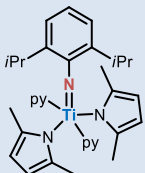<br>$\text{Ti(=NAr)(Me}_2\text{Pyr)}_2(\text{py})_2$ ( <b>2b</b> ) |        |        |                    |     |                     |       |     | <br>$\text{Zr(=NAr)(Me}_2\text{Pyr)}_2(\text{py})_2$ ( <b>1b</b> ) |        |        |                    |     |                     |       |     |
|-----------------------------------------------------------------------------------------------------------------------------------------------------|--------|--------|--------------------|-----|---------------------|-------|-----|------------------------------------------------------------------------------------------------------------------------------------------------------|--------|--------|--------------------|-----|---------------------|-------|-----|
| MO                                                                                                                                                  | E, eV  | Ti     | N <sub>imido</sub> | Ar  | Me <sub>2</sub> Pyr | other |     | MO                                                                                                                                                   | E, eV  | Zr     | N <sub>imido</sub> | Ar  | Me <sub>2</sub> Pyr | other |     |
| 147                                                                                                                                                 | HOMO   | -5.191 | 2%                 | -   | 7%                  | 89%   | 2%  | 147                                                                                                                                                  | HOMO   | -5.163 | 9%                 | 13% | 34%                 | 42%   | 2%  |
| 146                                                                                                                                                 | HOMO-1 | -5.194 | 3%                 | -   | 5%                  | 89%   | 3%  | 146                                                                                                                                                  | HOMO-1 | -5.184 | 3%                 | -   | 1%                  | 92%   | 4%  |
| 145                                                                                                                                                 | HOMO-2 | -5.518 | 20%                | 18% | 50%                 | 9%    | 3%  | 145                                                                                                                                                  | HOMO-2 | -5.295 | 6%                 | 6%  | 17%                 | 68%   | 2%  |
| 144                                                                                                                                                 | HOMO-3 | -6.352 | 4%                 | -   | 8%                  | 75%   | 13% | 144                                                                                                                                                  | HOMO-3 | -6.265 | -                  | -   | 97%                 | 2%    | 1%  |
| 143                                                                                                                                                 | HOMO-4 | -6.449 | -                  | -   | 96%                 | 2%    | 2%  | 143                                                                                                                                                  | HOMO-4 | -6.322 | 7%                 | 3%  | 2%                  | 76%   | 12% |
| 142                                                                                                                                                 | HOMO-5 | -6.529 | 10%                | -   | 4%                  | 77%   | 9%  | 142                                                                                                                                                  | HOMO-5 | -6.452 | 11%                | 26% | 49%                 | 12%   | 2%  |
| 141                                                                                                                                                 | HOMO-6 | -6.876 | 24%                | 40% | 28%                 | 2%    | 6%  | 141                                                                                                                                                  | HOMO-6 | -6.568 | 11%                | -   | 1%                  | 80%   | 8%  |
| 138                                                                                                                                                 | HOMO-9 | -8.339 | 6%                 | 24% | 38%                 | 30%   | 2%  | 140                                                                                                                                                  | HOMO-7 | -8.006 | 6%                 | 24% | 44%                 | 23%   | 3%  |

  

|                                                                                     |                                                                                     |                                                                                      |                                                                                       |
|-------------------------------------------------------------------------------------|-------------------------------------------------------------------------------------|--------------------------------------------------------------------------------------|---------------------------------------------------------------------------------------|
|   |   |   |   |
| 147 (HOMO)                                                                          | 146 (HOMO-1)                                                                        | 146 (HOMO-1)                                                                         | 145 (HOMO-2)                                                                          |
|  |  |  |  |
| 144 (HOMO-3)                                                                        | 142 (HOMO-5)                                                                        | 143 (HOMO-4)                                                                         | 141 (HOMO-6)                                                                          |
|  |  |  |  |
| 143 (HOMO-4)                                                                        | 145 (HOMO-2)                                                                        | 144 (HOMO-3)                                                                         | 147 (HOMO)                                                                            |
|  |  |  |  |
| 141 (HOMO-6)                                                                        | 138 (HOMO-9)                                                                        | 142 (HOMO-5)                                                                         | 140 (HOMO-7)                                                                          |

## Optimized Geometries

| Zr(=NtBu)(Me <sub>2</sub> Pyr) <sub>2</sub> (py) <sub>2</sub> ( <b>1a</b> ) |           |           |           | Ti(=NtBu)(Me <sub>2</sub> Pyr) <sub>2</sub> (py) <sub>2</sub> ( <b>2a</b> ) |           |           |           |
|-----------------------------------------------------------------------------|-----------|-----------|-----------|-----------------------------------------------------------------------------|-----------|-----------|-----------|
| E = -1331.69272031 a.u.                                                     |           |           |           | E = -1342.93358618 a.u.                                                     |           |           |           |
| Atom                                                                        | x         | y         | z         | Atom                                                                        | x         | y         | z         |
| Zr                                                                          | -0.00476  | -0.079358 | 0.147001  | Ti                                                                          | 0.000704  | 0.018688  | 0.149119  |
| N                                                                           | -2.290989 | -0.462306 | -0.455188 | N                                                                           | -0.355041 | 1.644671  | -1.094641 |
| N                                                                           | 0.573252  | -1.299436 | -1.630369 | N                                                                           | 0.398345  | -1.998341 | -0.164345 |
| N                                                                           | 0.044064  | -1.076927 | 1.682466  | N                                                                           | -2.171491 | -0.509661 | -0.061547 |
| N                                                                           | -0.607755 | 2.038358  | 0.52672   | C                                                                           | 0.993575  | 0.762401  | -3.070274 |
| N                                                                           | 2.26776   | 0.678834  | 0.168268  | H                                                                           | 1.983954  | 1.206106  | -2.917731 |
| C                                                                           | 0.418812  | -0.778934 | -2.905879 | H                                                                           | 0.828242  | 0.703153  | -4.147674 |
| C                                                                           | -2.706134 | -1.726166 | -0.583879 | H                                                                           | 1.044973  | -0.263022 | -2.697434 |
| H                                                                           | -1.969203 | -2.493049 | -0.375892 | N                                                                           | 2.184863  | 0.415931  | -0.188965 |
| C                                                                           | 2.696319  | 1.34339   | 1.245574  | N                                                                           | -0.051366 | 0.432539  | 1.777618  |
| H                                                                           | 1.973533  | 1.473855  | 2.042434  | C                                                                           | -0.121742 | 0.850623  | 3.154663  |
| C                                                                           | 1.336603  | -1.351774 | -3.754454 | C                                                                           | -2.639887 | -1.455102 | 0.758157  |
| H                                                                           | 1.424877  | -1.156659 | -4.814046 | H                                                                           | -1.921589 | -1.88096  | 1.447603  |
| C                                                                           | -1.453143 | 3.954956  | -0.316572 | C                                                                           | 2.627082  | 1.641759  | 0.106272  |
| H                                                                           | -1.586596 | 4.82348   | -0.946253 | H                                                                           | 1.884379  | 2.334697  | 0.480607  |
| C                                                                           | 2.053827  | -3.015371 | -0.528793 | C                                                                           | -4.820286 | -1.313106 | -0.188519 |
| H                                                                           | 2.56425   | -2.398857 | 0.217845  | H                                                                           | -5.856841 | -1.626827 | -0.237873 |
| H                                                                           | 2.752883  | -3.786392 | -0.857733 | C                                                                           | -0.080284 | 1.597358  | -2.455618 |
| H                                                                           | 1.222258  | -3.505459 | -0.015757 | C                                                                           | 1.686358  | -3.844331 | -0.302925 |
| C                                                                           | -2.153964 | 3.641084  | 0.872772  | H                                                                           | 2.383308  | -4.625041 | -0.032386 |
| H                                                                           | -2.955615 | 4.205571  | 1.328093  | C                                                                           | -4.335793 | -0.338758 | -1.043005 |
| C                                                                           | -3.993286 | -2.05136  | -0.964671 | H                                                                           | -4.970889 | 0.13438   | -1.780976 |
| H                                                                           | -4.280892 | -3.090954 | -1.055106 | C                                                                           | 3.94486   | 2.019942  | -0.061491 |
| C                                                                           | -3.153051 | 0.527364  | -0.708713 | H                                                                           | 4.251089  | 3.02644   | 0.193481  |
| H                                                                           | -2.781795 | 1.541202  | -0.591532 | C                                                                           | 0.996067  | -3.696213 | -1.528439 |
| C                                                                           | -0.714563 | 0.114288  | -3.286832 | H                                                                           | 1.030417  | -4.354672 | -2.385046 |
| H                                                                           | -1.648198 | -0.44897  | -3.398422 | C                                                                           | 1.297903  | -2.803692 | 0.506988  |
| H                                                                           | -0.502873 | 0.590218  | -4.245966 | C                                                                           | 0.209246  | -2.575089 | -1.413952 |
| H                                                                           | -0.918921 | 0.919452  | -2.574327 | C                                                                           | -0.821162 | 2.552506  | -3.109343 |
| C                                                                           | 0.590988  | 2.961822  | -1.50275  | H                                                                           | -0.786543 | 2.756064  | -4.170381 |
| H                                                                           | 1.534327  | 3.31153   | -1.067917 | C                                                                           | 4.846252  | 1.091704  | -0.559231 |
| H                                                                           | 0.340799  | 3.634521  | -2.325047 | H                                                                           | 5.887937  | 1.355686  | -0.702639 |
| H                                                                           | 0.79609   | 1.983627  | -1.949236 | C                                                                           | -1.261145 | 2.672726  | -0.913616 |
| C                                                                           | 1.588803  | -2.230503 | -1.704115 | C                                                                           | 4.388925  | -0.175262 | -0.874117 |
| C                                                                           | 4.411814  | 0.968903  | -0.826658 | H                                                                           | 5.050789  | -0.934036 | -1.271624 |
| H                                                                           | 5.058196  | 0.794699  | -1.677263 | C                                                                           | 3.051088  | -0.475293 | -0.678042 |
| C                                                                           | -4.460954 | 0.283891  | -1.09261  | H                                                                           | 2.656961  | -1.45859  | -0.911678 |
| H                                                                           | -5.123    | 1.11855   | -1.284274 | C                                                                           | -1.819867 | 3.056534  | 0.408791  |
| C                                                                           | -1.61318  | 2.475497  | 1.364474  | H                                                                           | -2.441162 | 2.271055  | 0.848481  |
| C                                                                           | -4.889726 | -1.025418 | -1.222708 | H                                                                           | -2.440246 | 3.947215  | 0.293285  |
| H                                                                           | -5.90797  | -1.245969 | -1.522461 | H                                                                           | -1.035633 | 3.284226  | 1.134861  |
| C                                                                           | -0.5107   | 2.969729  | -0.495782 | C                                                                           | 1.758491  | -2.539285 | 1.89448   |
| C                                                                           | 0.10463   | -1.89791  | 2.858645  | H                                                                           | 2.224661  | -1.55625  | 2.003948  |
| C                                                                           | 3.110061  | 0.497856  | -0.85353  | H                                                                           | 2.490782  | -3.295529 | 2.183145  |

|   |           |           |           |
|---|-----------|-----------|-----------|
| H | 2.727198  | -0.047785 | -1.710785 |
| C | -2.011265 | 1.747026  | 2.598633  |
| H | -2.395226 | 0.742994  | 2.394548  |
| H | -2.792716 | 2.306276  | 3.116171  |
| H | -1.170745 | 1.624669  | 3.286429  |
| C | -0.518273 | -1.18047  | 4.059502  |
| H | 0.010007  | -0.246044 | 4.261887  |
| H | -0.466193 | -1.805218 | 4.956489  |
| H | -1.566045 | -0.943595 | 3.866406  |
| C | 2.07989   | -2.281484 | -2.988171 |
| H | 2.876742  | -2.925095 | -3.333587 |
| C | 4.8549    | 1.653611  | 0.291338  |
| H | 5.86894   | 2.033909  | 0.340144  |
| C | 3.978342  | 1.84685   | 1.348129  |
| H | 4.277615  | 2.378807  | 2.242071  |
| C | 1.564077  | -2.223293 | 3.191598  |
| H | 2.03152   | -2.780578 | 2.378731  |
| H | 1.632158  | -2.822495 | 4.104794  |
| H | 2.130833  | -1.301547 | 3.345051  |
| C | -0.661277 | -3.202544 | 2.617821  |
| H | -1.709668 | -2.98884  | 2.394454  |
| H | -0.625466 | -3.850571 | 3.498887  |
| H | -0.232325 | -3.746876 | 1.773656  |

|   |           |           |           |
|---|-----------|-----------|-----------|
| H | 0.935754  | -2.578658 | 2.612052  |
| C | -1.568821 | 3.24143   | -2.126536 |
| H | -2.250556 | 4.066278  | -2.279222 |
| C | -0.830924 | -2.139573 | -2.39171  |
| H | -1.827309 | -2.48954  | -2.09895  |
| H | -0.608416 | -2.573386 | -3.368365 |
| H | -0.903604 | -1.058476 | -2.531535 |
| C | -3.005375 | 0.034626  | -0.951215 |
| H | -2.589828 | 0.797118  | -1.601524 |
| C | -3.95253  | -1.884102 | 0.729438  |
| H | -4.280762 | -2.654576 | 1.415337  |
| C | -1.571802 | 1.170964  | 3.531214  |
| H | -1.96039  | 1.999449  | 2.940567  |
| H | -1.636255 | 1.442774  | 4.588753  |
| H | -2.21055  | 0.300492  | 3.364662  |
| C | 0.379765  | -0.249911 | 4.092821  |
| H | -0.219923 | -1.155259 | 3.980289  |
| H | 0.30617   | 0.080608  | 5.132859  |
| H | 1.420748  | -0.499071 | 3.88535   |
| C | 0.749465  | 2.093477  | 3.358016  |
| H | 1.791945  | 1.869167  | 3.120438  |
| H | 0.702254  | 2.431273  | 4.397326  |
| H | 0.416712  | 2.912604  | 2.717702  |

| Zr(=NAr)(Me <sub>2</sub> Pyr) <sub>2</sub> (py) <sub>2</sub> ( <b>1b</b> ) |           |           |           |
|----------------------------------------------------------------------------|-----------|-----------|-----------|
| E = -1641.11747040 a.u.                                                    |           |           |           |
| Atom                                                                       | x         | y         | z         |
| Zr                                                                         | 0.000004  | -0.678061 | -0.000008 |
| N                                                                          | -0.000015 | 1.164572  | 0.000013  |
| N                                                                          | -2.209755 | -1.14567  | -0.799934 |
| N                                                                          | 0.793381  | -1.317599 | -1.988102 |
| N                                                                          | 2.209769  | -1.14564  | 0.799922  |
| N                                                                          | -0.793358 | -1.317677 | 1.988074  |
| C                                                                          | -2.440478 | -1.400323 | -2.093551 |
| H                                                                          | -1.564537 | -1.423648 | -2.731875 |
| C                                                                          | -0.000033 | 2.534919  | 0.000033  |
| C                                                                          | 1.240629  | -0.485244 | -3.005911 |
| C                                                                          | 1.193244  | 4.643175  | -0.007012 |
| H                                                                          | 2.128908  | 5.191837  | -0.011696 |
| C                                                                          | -0.000082 | 5.344576  | 0.000117  |
| H                                                                          | -0.000102 | 6.428627  | 0.000154  |
| C                                                                          | -1.240624 | -0.485355 | 3.005903  |
| C                                                                          | 1.2214    | 3.255636  | -0.00629  |
| C                                                                          | -1.221492 | 3.25559   | 0.006385  |
| C                                                                          | -2.537973 | 2.517511  | -0.039701 |
| H                                                                          | -2.347615 | 1.521191  | 0.369176  |
| C                                                                          | -3.709121 | -1.627702 | -2.591637 |
| H                                                                          | -3.841424 | -1.83059  | -3.646592 |

| Ti(=NAr)(Me <sub>2</sub> Pyr) <sub>2</sub> (py) <sub>2</sub> ( <b>2b</b> ) |           |           |           |
|----------------------------------------------------------------------------|-----------|-----------|-----------|
| E = -1652.35460005 a.u.                                                    |           |           |           |
| Atom                                                                       | x         | y         | z         |
| Ti                                                                         | 0.002327  | -0.614346 | -0.000018 |
| N                                                                          | -0.018827 | -1.222891 | 1.977507  |
| N                                                                          | 0.028181  | -1.222793 | -1.977495 |
| N                                                                          | 2.201476  | -1.127699 | 0.012259  |
| C                                                                          | -0.94068  | -3.56839  | 1.620144  |
| H                                                                          | -2.019689 | -3.497997 | 1.799269  |
| H                                                                          | -0.625816 | -4.565658 | 1.932973  |
| H                                                                          | -0.803733 | -3.511307 | 0.539045  |
| N                                                                          | -2.192726 | -1.144282 | -0.012309 |
| N                                                                          | -0.004118 | 1.080282  | -0.000083 |
| C                                                                          | -0.009407 | 2.457632  | -0.00003  |
| C                                                                          | 2.926389  | -0.865332 | -1.082146 |
| H                                                                          | 2.389044  | -0.417723 | -1.907975 |
| C                                                                          | -2.919518 | -0.887436 | 1.082154  |
| H                                                                          | -2.385469 | -0.435838 | 1.907958  |
| C                                                                          | 4.903009  | -1.758447 | -0.098211 |
| H                                                                          | 5.957661  | -2.005861 | -0.1414   |
| C                                                                          | -0.18446  | -2.537533 | 2.390758  |
| C                                                                          | -0.790152 | -1.427089 | -4.067163 |
| H                                                                          | -1.244128 | -1.176114 | -5.015355 |
| C                                                                          | 4.156646  | -2.037499 | 1.032228  |

|   |           |           |           |   |           |           |           |
|---|-----------|-----------|-----------|---|-----------|-----------|-----------|
| C | 2.537917  | 2.517624  | 0.03972   | H | 4.598257  | -2.507661 | 1.901487  |
| H | 2.347574  | 1.521281  | -0.369103 | C | -4.263137 | -1.191728 | 1.177259  |
| C | 2.440506  | -1.400287 | 2.093538  | H | -4.799759 | -0.960233 | 2.088448  |
| H | 1.564573  | -1.423604 | 2.731873  | C | -0.298313 | -2.690149 | -3.660018 |
| C | -4.549862 | -1.324839 | -0.381463 | H | -0.276507 | -3.602909 | -4.2388   |
| H | -5.356484 | -1.286812 | 0.339259  | C | -0.576017 | -0.552241 | -3.028862 |
| C | 1.380328  | -2.553845 | -2.207294 | C | 0.203739  | -2.536174 | -2.390657 |
| C | -1.193384 | 4.64313   | 0.007199  | C | 0.318893  | -2.687667 | 3.660062  |
| H | -2.129063 | 5.191762  | 0.011914  | H | 0.30405   | -3.600543 | 4.238879  |
| C | -2.101275 | -1.179232 | 3.821287  | C | -4.889424 | -1.795318 | 0.098282  |
| H | -2.587201 | -0.784081 | 4.702024  | H | -5.942184 | -2.05065  | 0.141514  |
| C | -4.785173 | -1.589651 | -1.719729 | C | 0.580374  | -0.547751 | 3.028796  |
| H | -5.792978 | -1.76408  | -2.079036 | C | -4.141053 | -2.06866  | -1.03223  |
| C | 2.191693  | -2.497791 | -3.311589 | H | -4.579173 | -2.542053 | -1.901502 |
| H | 2.770341  | -3.318284 | -3.712185 | C | -2.798544 | -1.729066 | -1.052367 |
| C | 0.767418  | 0.913664  | -3.196255 | H | -2.188367 | -1.930479 | -1.925006 |
| H | -0.311695 | 0.958926  | -3.381028 | C | 0.93767   | 0.89677   | 2.99508   |
| H | 1.264269  | 1.344547  | -4.067013 | H | 1.731676  | 1.120759  | 2.276946  |
| H | 0.962606  | 1.555692  | -2.336139 | H | 1.287046  | 1.199546  | 3.983843  |
| C | -0.767514 | 0.91359   | 3.196231  | H | 0.090299  | 1.530142  | 2.724086  |
| H | 0.31162   | 0.958948  | 3.380849  | C | -0.944124 | 0.889576  | -2.995305 |
| H | -1.264282 | 1.344392  | 4.067076  | H | -1.739871 | 1.107734  | -2.277304 |
| H | -0.962886 | 1.555632  | 2.336169  | H | -1.295628 | 1.189627  | -3.984144 |
| C | -3.250795 | -1.109105 | 0.042358  | H | -0.101544 | 1.529296  | -2.724276 |
| H | -3.026561 | -0.910306 | 1.085038  | C | 0.80122   | -1.420914 | 4.06711   |
| C | 4.54987   | -1.324827 | 0.381424  | H | 1.253397  | -1.166482 | 5.01524   |
| H | 5.356484  | -1.286812 | -0.339309 | C | 0.967656  | -3.561265 | -1.61994  |
| C | 2.998302  | 2.341995  | 1.486529  | H | 2.046101  | -3.482881 | -1.799176 |
| H | 3.209942  | 3.314606  | 1.94031   | H | 0.660174  | -4.56091  | -1.932523 |
| H | 3.909664  | 1.73806   | 1.54113   | H | 0.830404  | -3.504979 | -0.538843 |
| H | 2.225588  | 1.857315  | 2.086643  | C | 2.811625  | -1.70801  | 1.052291  |
| C | 2.10137   | -1.179057 | -3.821255 | H | 2.202931  | -1.914097 | 1.924858  |
| H | 2.587315  | -0.783867 | -4.701963 | C | 4.272268  | -1.159509 | -1.177181 |
| C | 3.2508    | -1.109087 | -0.042383 | H | 4.807197  | -0.923942 | -2.088325 |
| H | 3.026558  | -0.910294 | -1.085063 | C | -1.219074 | 3.175865  | 0.174781  |
| C | -1.380233 | -2.553955 | 2.207273  | C | -1.195335 | 4.563521  | 0.174222  |
| C | -2.191556 | -2.497961 | 3.311603  | C | -0.020308 | 5.27157   | 0.000021  |
| H | -2.770142 | -3.31849  | 3.712212  | C | 1.160172  | 4.57265   | -0.174177 |
| C | 3.709154  | -1.627667 | 2.591611  | C | 1.19467   | 3.185211  | -0.174766 |
| H | 3.841468  | -1.830544 | 3.646566  | H | -0.024514 | 6.355522  | 0.000031  |
| C | 4.785196  | -1.589628 | 1.71969   | H | 2.086083  | 5.120943  | -0.313227 |
| H | 5.793005  | -1.76406  | 2.078986  | H | -2.125472 | 5.104607  | 0.313303  |
| C | -1.116429 | -3.736446 | 1.344863  | C | 2.513928  | 2.483388  | -0.388459 |
| H | -1.331654 | -3.553526 | 0.285416  | C | 3.608589  | 2.975744  | 0.554256  |
| H | -1.75498  | -4.564709 | 1.655722  | H | 3.876286  | 4.016953  | 0.356162  |
| H | -0.080248 | -4.084909 | 1.411328  | H | 3.296449  | 2.906086  | 1.59847   |
| C | 3.634921  | 3.158804  | -0.801334 | H | 4.51538   | 2.377013  | 0.428585  |
| H | 3.307733  | 3.314995  | -1.831685 | C | 2.96692   | 2.600581  | -1.843298 |
| H | 4.519742  | 2.516164  | -0.81963  | H | 3.135097  | 3.646635  | -2.114673 |

|   |           |           |           |   |           |          |           |
|---|-----------|-----------|-----------|---|-----------|----------|-----------|
| H | 3.949849  | 4.125115  | -0.398423 | H | 2.217175  | 2.199715 | -2.529596 |
| C | -2.998219 | 2.341799  | -1.486545 | H | 3.904915  | 2.060639 | -2.005417 |
| H | -3.209869 | 3.314383  | -1.94038  | H | 2.341005  | 1.429476 | -0.171329 |
| H | -3.909545 | 1.737815  | -1.541208 | C | -2.532823 | 2.463777 | 0.388497  |
| H | -2.225424 | 1.857139  | -2.086569 | C | -3.631305 | 2.947391 | -0.554283 |
| C | -3.635091 | 3.158652  | 0.80123   | H | -3.318572 | 2.880121 | -1.598478 |
| H | -3.307995 | 3.314927  | 1.831598  | H | -3.907269 | 3.986459 | -0.356282 |
| H | -4.519861 | 2.515942  | 0.819493  | H | -4.533336 | 2.341506 | -0.428616 |
| H | -3.950068 | 4.124913  | 0.39824   | C | -2.986712 | 2.577554 | 1.84334   |
| C | 1.116548  | -3.736357 | -1.344905 | H | -3.162997 | 3.622305 | 2.114595  |
| H | 1.33177   | -3.553456 | -0.285453 | H | -3.920489 | 2.030368 | 2.005519  |
| H | 1.755117  | -4.564601 | -1.655781 | H | -2.233873 | 2.182605 | 2.529685  |
| H | 0.080375  | -4.084839 | -1.41138  | H | -2.351621 | 1.411243 | 0.171476  |

## XRD Crystallography

For single crystal X-ray diffraction analysis, suitable crystals were placed onto MiTeGen loop pins coated in Paratone<sup>®</sup> oil and mounted under a flow of nitrogen at 100 K on a Bruker Smart Apex II diffractometer with CCD area detector using Mo K $\alpha$  irradiation. Using Olex2<sup>[9]</sup> the structures were solved with the SUPERFLIP package<sup>[10, 11]</sup> and refined using SHELXL<sup>[12]</sup>. All non-hydrogen atoms were refined with anisotropic displacement parameters. Hydrogen atoms were placed in ideal positions and refined as riding atoms.

**Table S12.** Crystal data, data collection and structure refinement parameters for compounds **1a**, **1b**.

| Identification code                         | 1a                                                                     | 1b                                                                     |
|---------------------------------------------|------------------------------------------------------------------------|------------------------------------------------------------------------|
| CCDC Deposition Number                      | 2158160                                                                | 2158161                                                                |
| Empirical formula                           | C <sub>26</sub> H <sub>35</sub> N <sub>5</sub> Zr                      | C <sub>34</sub> H <sub>43</sub> N <sub>5</sub> Zr                      |
| Formula weight                              | 508.81                                                                 | 612.95                                                                 |
| Temperature/K                               | 100.01                                                                 | 100.0                                                                  |
| Crystal system                              | triclinic                                                              | monoclinic                                                             |
| Space group                                 | P -1                                                                   | P2 <sub>1</sub> /c                                                     |
| a/Å                                         | 9.5458(3)                                                              | 14.7788(3)                                                             |
| b/Å                                         | 10.0123(3)                                                             | 11.6370(2)                                                             |
| c/Å                                         | 14.9998(5)                                                             | 19.7916(4)                                                             |
| $\alpha$ /°                                 | 101.922(2)                                                             | 90                                                                     |
| $\beta$ /°                                  | 92.277(2)                                                              | 109.9450(10)                                                           |
| $\gamma$ /°                                 | 111.033(2)                                                             | 90                                                                     |
| Volume/Å <sup>3</sup>                       | 1299.01(7)                                                             | 3199.62(11)                                                            |
| Z                                           | 2                                                                      | 4                                                                      |
| $\rho_{\text{calc}}$ /g/cm <sup>3</sup>     | 1.301                                                                  | 1.272                                                                  |
| $\mu$ /mm <sup>-1</sup>                     | 0.445                                                                  | 0.373                                                                  |
| F(000)                                      | 532.0                                                                  | 1288.0                                                                 |
| Radiation                                   | MoK $\alpha$ ( $\lambda$ = 0.71073)                                    | MoK $\alpha$ ( $\lambda$ = 0.71073)                                    |
| 2 $\theta$ range for data collection/°      | 4.486 to 52.742                                                        | 4.128 to 52.804                                                        |
| Index ranges                                | -10 $\leq$ h $\leq$ 11, -12 $\leq$ k $\leq$ 12, -16 $\leq$ l $\leq$ 18 | -18 $\leq$ h $\leq$ 18, -14 $\leq$ k $\leq$ 14, -24 $\leq$ l $\leq$ 24 |
| Reflections collected                       | 29762                                                                  | 47298                                                                  |
| Independent reflections                     | 5273 [R <sub>int</sub> = 0.0433, R <sub>sigma</sub> = 0.0359]          | 6572 [R <sub>int</sub> = 0.0380, R <sub>sigma</sub> = 0.0255]          |
| Data/restraints/parameters                  | 5273/0/296                                                             | 6572/0/369                                                             |
| Goodness-of-fit on F <sup>2</sup>           | 1.040                                                                  | 1.047                                                                  |
| Final R indexes [ $I \geq 2\sigma(I)$ ]     | R <sub>1</sub> = 0.0404, wR <sub>2</sub> = 0.0983                      | R <sub>1</sub> = 0.0308, wR <sub>2</sub> = 0.0783                      |
| Final R indexes [all data]                  | R <sub>1</sub> = 0.0495, wR <sub>2</sub> = 0.1043                      | R <sub>1</sub> = 0.0394, wR <sub>2</sub> = 0.0823                      |
| Largest diff. peak/hole / e Å <sup>-3</sup> | 0.95/-0.52                                                             | 0.58/-0.39                                                             |



## References

- [1] P. A. Zhizhko, A. V. Pichugov, N. S. Bushkov, F. Allouche, A. A. Zhizhin, D. N. Zarubin, N. A. Ustynyuk, 'Catalytic Oxo/Imido Heterometathesis by a Well-Defined Silica-Supported Titanium Imido Complex', *Angew. Chem. Int. Ed.* **2018**, *57*, 10879-10882.
- [2] *Gaussian 09, Revision D.01*. M. J. Frisch, G. W. Trucks, H. B. Schlegel, G. E. Scuseria, M. A. Robb, J. R. Cheeseman, G. Scalmani, V. Barone, B. Mennucci, G. A. Petersson, H. Nakatsuji, M. Caricato, X. Li, H. P. Hratchian, A. F. Izmaylov, J. Bloino, G. Zheng, J. L. Sonnenberg, M. Hada, M. Ehara, K. Toyota, R. Fukuda, J. Hasegawa, M. Ishida, T. Nakajima, Y. Honda, O. Kitao, H. Nakai, T. Vreven, J. A. Montgomery, J. J. E. Peralta, F. Ogliaro, M. Bearpark, J. J. Heyd, E. Brothers, K. N. Kudin, V. N. Staroverov, R. Kobayashi, J. Normand, K. Raghavachari, A. Rendell, J. C. Burant, S. S. Iyengar, J. Tomasi, M. Cossi, N. Rega, J. M. Millam, M. Klene, J. E. Knox, J. B. Cross, V. Bakken, C. Adamo, J. Jaramillo, R. Gomperts, R. E. Stratmann, O. Yazyev, A. J. Austin, R. Cammi, C. Pomelli, J. W. Ochterski, R. L. Martin, K. Morokuma, V. G. Zakrzewski, G. A. Voth, P. Salvador, J. J. Dannenberg, S. Dapprich, A. D. Daniels, Ö. Farkas, J. B. Foresman, J. V. Ortiz, J. Cioslowski, D. J. Fox. Gaussian Inc., Wallingford CT, 2013.
- [3] C. Adamo, V. Barone, 'Toward Reliable Density Functional Methods without Adjustable Parameters: The PBE0 Model', *J. Chem. Phys.* **1999**, *110*, 6158-6170.
- [4] A. Schäfer, C. Huber, R. Ahlrichs, 'Fully Optimized Contracted Gaussian Basis Sets of Triple Zeta Valence Quality for Atoms Li to Kr', *J. Chem. Phys.* **1994**, *100*, 5829-5835.
- [5] F. Weigend, R. Ahlrichs, 'Balanced Basis Sets of Split Valence, Triple Zeta Valence and Quadruple Zeta Valence Quality for H to Rn: Design and Assessment of Accuracy', *Phys. Chem. Chem. Phys.* **2005**, *7*, 3297-3305.
- [6] D. Andrae, U. Häußermann, M. Dolg, H. Stoll, H. Preuß, 'Energy-Adjusted *Ab Initio* Pseudopotentials for the Second and Third Row Transition Elements', *Theoret. Chim. Acta* **1990**, *77*, 123-141.
- [7] *NBO 5.9*. E. D. Glendening, J. K. Badenhoop, A. E. Reed, J. E. Carpenter, J. A. Bohmann, C. M. Morales, F. Weinhold. Theoretical Chemistry Institute, University of Wisconsin, Madison, WI, 2012; <http://www.chem.wisc.edu/~nbo5>.
- [8] L. V. Skripnikov, Chemissian, Version 4.67 (2020), Visualization Computer Program. <http://www.chemissian.com>.
- [9] O. V. Dolomanov, L. J. Bourhis, R. J. Gildea, J. A. K. Howard, H. Puschmann, 'OLEX2: A Complete Structure Solution, Refinement and Analysis Program', *J. Appl. Crystallogr.* **2009**, *42*, 339-341.
- [10] L. Palatinus, G. Chapuis, 'SUPERFLIP - A Computer Program for the Solution of Crystal Structures by Charge Flipping in Arbitrary Dimensions', *J. Appl. Crystallogr.* **2007**, *40*, 786-790.
- [11] L. Palatinus, A. van der Lee, 'Symmetry Determination Following Structure Solution in P1', *J. Appl. Crystallogr.* **2008**, *41*, 975-984.
- [12] G. Sheldrick, 'Crystal Structure Refinement with SHELXL', *Acta Cryst.* **2015**, *C71*, 3-8.
